1 **Human bone marrow mesenchymal stem/stromal cell behaviour is**  
2 **coordinated via mechanically activated osteocyte-derived**  
3 **extracellular vesicles**

4  
5  
6 **Authors**

7 Kian F. Eichholz<sup>1,2,3</sup>, Ian Woods<sup>1,2,3</sup>, Gillian P. Johnson<sup>1,2,3</sup>, Nian Shen<sup>1,2,3</sup>, Michele  
8 Corrigan<sup>1,2,3</sup>, Marie-Noelle Labour<sup>1,2,3</sup>, Kieran Wynne<sup>4,5</sup> Michelle C. Lowry<sup>6</sup>, Lorraine  
9 O'Driscoll<sup>6</sup>, David A. Hoey<sup>1,2,3,7</sup>

10  
11 **Affiliations**

12 <sup>1</sup>Dept. Mechanical, Aeronautical and Biomedical Engineering, Materials and Surface  
13 Science Institute, University of Limerick, Limerick, Ireland

14 <sup>2</sup>Trinity Centre for Bioengineering, Trinity Biomedical Sciences Institute, Trinity College  
15 Dublin, Ireland

16 <sup>3</sup>Dept. of Mechanical and Manufacturing Engineering, School of Engineering, Trinity  
17 College Dublin, Ireland.

18 <sup>4</sup>UCD Conway Institute of Biomolecular and Biomedical Research, University College  
19 Dublin, Dublin 4, Ireland.

20 <sup>5</sup>Mass Spectrometry Resource, University College Dublin, Dublin 4, Ireland.

21 <sup>6</sup>School of Pharmacy and Pharmaceutical Sciences and Trinity Biomedical Sciences  
22 Institute, Trinity College Dublin, Dublin, Ireland.

23 <sup>7</sup>Advanced Materials and Bioengineering Research Centre, Trinity College Dublin & RCSI.

24  
25  
26  
27  
28  
29  
30

31 **Abstract**

32 Osteocytes are mechanosensitive cells that are believed to play a fundamental role in  
33 coordinating bone mechanoadaptation via the secretion of paracrine factors. However, the exact  
34 mechanisms by which osteocytes relay mechanical signals to effector cells is poorly understood.  
35 In this study, we demonstrated that osteocytes subjected to a physiologic fluid shear secrete a  
36 distinct collection of factors that significantly enhance human MSC recruitment and  
37 osteogenesis. Utilising proteomics we generated an extensive map of proteins within the  
38 mechanically activated osteocyte secretome, identifying numerous paracrine factors that are  
39 modified by mechanical stimulation. Moreover, we identified the presence of extracellular  
40 vesicles (EVs) and further demonstrated that these mechanically activated osteocyte derived EVs  
41 (MAEVs) coordinate human MSCs recruitment and osteogenesis. This indicates that mechanical  
42 conditioning of parent cells can modify EVs and demonstrates the pro-osteogenic potential of  
43 MAEVs as a cell-free therapy to enhance bone regeneration and repair in diseases such as  
44 osteoporosis.

45

## 46 **Introduction**

47 Osteocytes are the most abundant cell type in bone and are known as the primary sensing and  
48 metabolism-controlling cells within the tissue. Osteocytes are key to directing the processes of  
49 bone formation and resorption via the secretion of various signalling factors which act upon bone  
50 forming osteoblasts and resorbing osteoclasts and their progenitors, skeletal and haematopoietic  
51 stem cells [1]. The implications of this can be seen in the highly debilitating and life threatening  
52 disease that is osteoporosis, which has been linked to osteocyte apoptosis [2] and reduced  
53 osteocyte numbers in affected patients [3]. This results in a significant drop in quality of life,  
54 increased risk of additional complications due to immobilisation, and significantly increased  
55 mortality rates due to fracture and secondary causes [4]. Not only do osteocytes have key  
56 functions in bone, they have also been shown to be involved in a large range of other major  
57 functions throughout the body [5], including heart, muscle and liver function, and suppressing  
58 breast cancer growth and metastasis in bone [6]. This highlights the critical role of the osteocyte  
59 in human health, and the importance of better understanding osteocyte signalling factors for the  
60 development of therapeutics to treat orthopaedic and systemic diseases.

61  
62 A prime example of osteocyte sensing and coordination of bone physiology is in  
63 mechanoadaptation, with mechanical loading leading to enhanced bone formation and unloading  
64 leading to bone loss [7]. In response to macroscale deformation of bone, resident osteocytes  
65 sense the micro-mechanical environment consisting of oscillatory fluid flow-induced shear stress  
66 and relay this biophysical signal to effector cells [8]. Mechanically-stimulated osteocytes can  
67 enhance the bone forming capacity of osteoblasts via direct cell-cell contact [9], in addition to  
68 secreted factors as demonstrated by conditioned media experiments [10, 11]. Furthermore, this  
69 same mechanically-activated osteocyte conditioned media was also shown to inhibit osteoclast  
70 formation [12, 13]. Due to the non-proliferative state and short lifespan of mature bone cells,  
71 continuous bone formation requires the replenishment of the exhausted osteoblast from a  
72 mesenchymal stem/stromal cell (MSC) population [14]. Interestingly the osteocyte has also been  
73 shown to coordinate MSC behaviour, with conditioned media from mechanically stimulated  
74 osteocytes enhancing MSC proliferation, recruitment and osteogenic differentiation,  
75 demonstrating the far reaching influence of this cell type, particularly in response to a  
76 mechanical stimulus [10].

77

78 The means by which osteocytes coordinate this mechanoadaptation of bone is of great interest,  
79 with several key factors identified as playing a role in this regard and, therefore, targeted as  
80 therapeutics. There has been a plethora of studies investigating various osteocyte derived factors  
81 released in response to fluid shear, including nitric oxide (NO), prostaglandin E<sub>2</sub>, ATP, RANKL,  
82 osteoprotegerin (OPG) and macrophage colony-stimulating factor (M-CSF) [1]. One factor that  
83 has gained much interest is sclerostin (SOST) which is released by osteocytes and inhibits Wnt-  
84 mediated bone formation. SOST expression is inhibited following mechanical loading and  
85 inhibition of this protein via anti-sclerostin therapy has been shown in clinical trials to increase  
86 bone mineral density and reduce fracture risk [15]. To gain a greater understanding of the factors  
87 expressed by physically stimulated osteocytes, others have taken a more global approach,  
88 utilising microarrays to study global gene expression in osteocytes subjected to cyclic  
89 compressive forces [16] and osteocytes isolated from murine trabecular bone following vertebrae  
90 loading [17]. Furthermore, a proteomic analysis has been combined with a transcriptomic  
91 analysis of osteocytes subjected to fluid shear to investigate protein as well as gene expression  
92 information and reveal novel interactions between them [18]. These studies revealed the altered  
93 proteome of the osteocyte, due to fluid flow stimulation, and identified a range of proteins which  
94 may be involved in mechanotransduction, including nucleoside diphosphate kinase and calcyclin,  
95 which are of interest due to their roles in ATP and calcium-binding, respectively. However, to  
96 date, the full secretome protein signature of the osteocyte and how this is altered in response to  
97 mechanical stimulation is unknown.

98

99 A route of cell-cell communication which has garnered much attention of late is via extracellular  
100 vesicles (EVs). EVs are spherical proteolipids bi-layer surrounded vesicles secreted from cells  
101 and are involved in cell-cell communication. EVs can apparently transfer cargo including lipids,  
102 proteins and nucleic acid from one cell to another, thereby influencing the recipient cell function  
103 [19]. Interestingly, it has recently been shown that bone cells release EVs and utilise these  
104 vesicles as a mechanism to mediate osteoblast and stem/stromal cell osteogenesis [20-23].  
105 Moreover, osteocyte-derived EVs contain miRNAs known to mediate osteoblast function,  
106 highlighting a potential non-protein based role in bone cell communication [24, 25]. Bone  
107 derived EVs may also be exploited as a potential therapy for various diseases, as well as having

108 potential for treatment of critical size bone defects [26]. Osteoblast-derived EVs loaded with  
109 bisphosphonates have been shown to inhibit osteoclast activity *in vitro* and *in vivo* [27],  
110 supporting their potential as a powerful drug delivery method. Interestingly, the release of EVs -  
111 and thus their content- may also be altered by mechanical loading. In fact, EV release into  
112 plasma increases following exercise, with a differential protein cargo in EVs from subjects after  
113 exercise compared to those at rest [28]. Therefore, a potential mechanism of osteocyte-mediated  
114 mechanoadaptation in bone may be facilitated by mechanically-activated extracellular vesicles  
115 (MAEVs).

116  
117 While changes in several factors in and released by osteocytes have been shown via proteomics  
118 analysis, the specific composition and factors implicated in mechanically-mediated osteocyte  
119 paracrine signalling are yet to be elucidated. Thus, the aim of this study was to further investigate  
120 the means by which osteocytes mediate bone mechanoadaptation, with this being achieved by  
121 constructing, for the first time, an extensive map of the osteocyte secretome protein signature.  
122 Thus, we first validated the ability of the osteocyte secretome to induce a chemotactic and  
123 osteogenic response in hMSCs using a parallel plate flow chamber approach to mechanically  
124 stimulate osteocytes. We then conducted a proteomic analysis on the osteocyte secretome via  
125 mass spectrometry, to identify proteins released by cells under both static and dynamic culture  
126 conditions. Enrichment of gene ontology terms was investigated to elucidate the primary cellular  
127 components and processes with which the osteocyte secretome is involved, with further analysis  
128 comparing the altered protein release and most differentially expressed proteins released by  
129 mechanically-stimulated cells. This led to the discovery of mechanically-activated extracellular  
130 vesicles (MAEVs). Specifically, EVs were subsequently separated from the secretome of  
131 mechanical-activated osteocyte; characterised; and found to elicit similar trends in MSC  
132 recruitment and osteogenesis to that seen with conditioned media (i.e. whole secretome). This  
133 demonstrated a key role for osteocyte EVs in mediating hMSC behaviour, identifying a novel  
134 mechanism by which osteocytes coordinate loading-induced bone formation.

135

## 136 **Results**

### 137 **Osteocytes regulate human MSC recruitment and osteogenesis in response to fluid shear**

138 hMSCs were cultured in conditioned medium collected from statically (CM-S) and dynamically  
139 (CM-F) cultured osteocytes, with recruitment and osteogenic gene expression being investigated  
140 (Figure 1A). A trend of increased hMSC recruitment towards CM-S compared to control  
141 medium was observed; however, this was not significant. CM-F did, however, enhance MSC  
142 recruitment; an affect that was significantly greater than with either medium (3.2-fold;  $p < 0.001$ ,  
143  $n = 9$ ) or CM-S (1.8-fold;  $p < 0.01$ ,  $n = 9$ ), indicating the enhanced chemotaxis displayed by  
144 MSCs towards mechanically-stimulated osteocytes. The role of osteocyte paracrine signalling in  
145 driving osteogenesis was also investigated by treating hMSCs with CM-S or CM-F for 24 h and  
146 investigating expression of osteogenic genes COX2, OCN, OPN, RUNX2 and OSX (Figure 1B).  
147 Treatment with CM-S did not significantly alter expression of any of the investigated genes in  
148 hMSCs compared to medium. hMSCs cultured in CM-F resulted in consistently increased  
149 expression of all genes evaluated, with significant fold changes of 4.6 in COX2, 5.4 in OPN and  
150 3.4 in RUNX2 compared to medium ( $p < 0.001$ ,  $n = 4-6$ ). These genes were also significantly  
151 upregulated with CM-F compared to CM-S with 3.0-, 2.2- and 2.3- fold changes, respectively ( $P$   
152  $< 0.01 - 0.001$ ,  $n = 4-6$ ). There was a near-significant 3.1-fold increase in OSX with CM-F  
153 compared to medium ( $p = 0.07$ ,  $n = 4-6$ ), in addition to a 2.5-fold increase in OCN expression in  
154 CM-F compared to CM-S. In summary, CM-S elicits marginal increases in hMSC osteogenesis,  
155 with significant increases following CM-F treatment, supporting the importance of mechanical-  
156 loading in mediating osteocyte-MSC mechanosignaling.

157

### 158 **Overview of identified proteins within the osteocyte secretome**

159 Analysis of the osteocyte secretome revealed a total of 393 proteins across all groups. Within  
160 these groups, over 300 proteins were identified in both the CM-S and CM-F groups, with 112  
161 being identified in Medium control (Figure 2C). Pearson correlations, comparing all biological  
162 replicates to one another, show that there is a high average correlation between replicates in the  
163 CM-S (0.92) and CM-F (0.90) groups (Figure 2D). When comparing CM-S and CM-F to one  
164 another, an average correlation of 0.90 is seen, revealing a significant degree of similarity in  
165 protein expression between osteocytes cultured in static and dynamic conditions. In contrast,  
166 when comparing CM groups (CM-S and CM-F) to Medium, an average correlation of 0.33 was  
167 seen between them, demonstrating the difference in the osteocyte secretome and osteocyte  
168 culture media indicating the release of proteins into culture medium from the osteocyte.

169 **Proteomic analysis of the osteocyte secretome reveals enrichment of proteins associated**  
170 **with EVs**

171 Hierarchical clustering revealed three primary groups of protein expression within the samples.  
172 CM-S and CM-F groups comprise one of the main clusters (Figure 3A), where it can be seen that  
173 there is considerable similarity of protein content in terms of LFQ intensity within these groups.  
174 Medium samples comprise the remaining column clusters, where the reduced number and  
175 expression of proteins are more apparent when considering data without imputation (Figure 3B).  
176 Due to the similarity between osteocyte conditioned medium groups, also verified via PCA  
177 (Figure S 2), an analysis was first undertaken by combining CM-S and CM-F (termed CM), and  
178 comparing it to Medium to identify the proteins which comprise the osteocyte secretome. The  
179 results of this reveal the presence of 97 proteins which have significant differential expression in  
180 CM, indicated in red in Figure 3C, and listed in Table 1. Within these proteins, significant  
181 enrichment (enrichment factor  $> 1.7$ ,  $p < 10^{-4}$ ) of several “extracellular” GOCC terms was shown  
182 in comparison to the total 393 identified proteins using Fisher’s exact test, with enrichment of  
183 UniProt keywords “secreted” and “signal” (enrichment factor  $> 1.6$ ,  $p < 10^{-5}$ ) also occurred  
184 (Figure 3D). This validates the successful isolation of proteins released by the osteocyte into  
185 their surrounding environment, with evidence for further downstream signalling functions.  
186 Functional enrichment within CM proteins of GOCC terms with reference to the whole *Mus*  
187 *musculus* genome further reported the significant enrichment of membrane-bound vesicles and  
188 exosomes in the secretome (Table S 2). This suggested a potential role for EVs, and in particular  
189 exosomes (FDR  $< 10^{-40}$ ), in transporting signalling factors released by osteocytes. Functional  
190 enrichment of GOBP, GOMF and Pfam terms was also investigated, showing significant roles  
191 for these proteins in mechanosensing and mechanosignaling, as evidenced by the most  
192 significantly enriched terms “response to stress” (FDR  $< 10^{-6}$ ) and “protein complex binding”  
193 (FDR  $< 10^{-8}$ ). The interaction network between identified proteins in the osteocyte secretome  
194 reveals a highly significant degree of protein-protein interaction ( $p < 10^{-16}$ ) as illustrated in  
195 Figure S 1. Enrichment analyses were also conducted on proteins more abundantly expressed in  
196 the control Medium samples using Fisher’s exact test (Figure S 3) and functional enrichment  
197 (Table S 4), revealing enrichment of muscle and cytoskeletal terms. These associations are likely  
198 due to the incorporation of proteins from rat tail collagen type 1 used for coating glass slides.

199

## 200 **Mechanical stimulation alters the protein release characteristics in osteocytes**

201 Subsequent analysis separating the CM-S and CM-F groups showed that different proteins were  
202 released from statically-cultured and mechanically-stimulated osteocytes, highlighting the role of  
203 external mechanical forces in regulating the osteocyte secretome. The more stringent criteria of  
204 only considering proteins identified in all three biological replicates in at least one of the groups  
205 reduced the total number of proteins of interest to 317. A total of 34 proteins were identified with  
206 varying degrees of significance and differential expression between groups, with 32 of these  
207 indicated on a volcano plot (Figure 4A), and a further 2 not present on the plot due to being  
208 present in only one of the CM groups. LFQ intensities of some of the most differentially  
209 expressed proteins with greater expression in CM-S (Figure 4B-D) or CM-F (Figure 4E-F) are  
210 highlighted. Of note is the enrichment of 14-3-3 proteins, all of which are upregulated in CM-F  
211 ( $\log_2$  fold change = 1.43 – 2.33). Of particular interest are annexin A5 ( $\log_2$  fold change = 2.39),  
212 which is associated with EVs and blood microparticles suggesting a role in systemic signalling,  
213 and histone H4 ( $\log_2$  fold change = 2.00) which is associated with osteogenic growth peptide  
214 (OGP) and known to stimulate osteoblast activity [29].

215  
216 Subsequently, functional enrichment in differentially secreted proteins between CM-F and CM-S  
217 was investigated to help further elucidate their collective biological relevance in mechanically  
218 mediated osteocyte signalling (Table S 3). The top four enriched GOCC terms: extracellular  
219 region, membrane-bounded vesicle, extracellular region part and extracellular exosome are  
220 associated with EV proteins with a highly significant false discovery rate ( $FDR < 10^{-10}$ ). 65 –  
221 76% of all differentially secreted proteins were associated with these terms. This confirms that  
222 EVs are not only implicated in the osteocyte secretome, as demonstrated above, but are a key  
223 component of mechanically-mediated signalling. Also of substantial interest is the enrichment of  
224 the top two GOMF terms “calcium ion binding” ( $FDR < 0.01$ ) and “phosphoserine binding”  
225 ( $FDR < 0.05$ ), revealing the potential role of mechanically-activated osteocyte EVs as sites of  
226 mineralisation via binding of calcium and phosphate components. A String DB network was  
227 constructed to further investigate any potential interactions between proteins associated with EVs  
228 (Figure 4H) revealing a significant degree of protein-protein interaction ( $p < 10^{-3}$ ). Interestingly,  
229 there are several interactions between positively and negatively regulated proteins, including an  
230 interaction path between Anxa5 and Ywhab/Ywhae which are associated with calcium ion



231 binding and phosphoserine binding, respectively. Between these nodes are gelsolin and cofilin,  
232 the former of which is calcium sensitive and both of which have been shown to regulate changes  
233 in the actin cytoskeleton [30], as well as occurring in vesicles from mineralising osteoblasts [31].

234

235 **EVs are present within the osteocyte secretome and EV morphology and size distribution is**  
236 **not altered by mechanical stimulation**

237 Given the identification of EV-associated proteins within the osteocyte secretome, we next  
238 investigated whether osteocytes release EVs and, if so, whether EV characteristics were altered  
239 by mechanical stimulation. EVs were successfully separated from osteocyte CM using filtration  
240 and ultracentrifugation, with the presence of EVs confirmed by TEM imaging and  
241 immunoblotting. TEM imaging confirmed the presence of EVs of typical morphology and size  
242 (Figure 5A-B). The presence of EVs was further confirmed via immunoblotting, with no  
243 detection of negative marker GRP-94, and detection of positive markers TSG101 and ALIX  
244 (Figure 5C). EV concentration was not significantly different between EVs separated from the  
245 CM-S (EV-S) and EVs separated from the CM-F (EV-F), both being within the range of 0.8 –  
246 2.6 µg/ml, and with average values of 1.2 µg/ml and 1.5 µg/ml, respectively (Figure 5D). It can  
247 be seen that there is a change in particle size distributions between EV-S and EV-F (Figure 5E),  
248 however, no changes in average particle size was detected, with values of 177 nm and 183 nm  
249 respectively (Figure 5F).

250

251 **Osteocytes regulate human MSC recruitment and osteogenesis in response to fluid flow**  
252 **shear via MAEVs**

253 To determine whether mouse osteocyte-derived EVs could be taken up by hMSCs, we labelled  
254 EVs with PKH26. Following 24 hr treatment, labelled-EVs were preferentially located within the  
255 cytoplasm, indicating uptake of EVs by hMSCs (Figure 5G). Control samples are illustrated in  
256 Figure S 4. A high density of EVs can be seen around the nuclear region in particular with  
257 minimal detection within the nucleus.

258

259 Upon verifying EV uptake, the cellular response of hMSCs subjected to EVs separated from  
260 CM-S (i.e. EV-s) or CM-F (EV-F) was investigated. Specifically, hMSCs were treated with EV-  
261 S and EV-F to investigate recruitment and osteogenic gene expression as previously

262 demonstrated with CM. EV-S resulted in a slight non-significant increase in MSC recruitment  
263 (Figure 5H), while this response was significantly enhanced with EV-F, yielding a 3.7-fold  
264 increase compared to medium ( $p < 0.001$ ,  $n = 9$ ) and 2.3 fold increase compared to EV-S ( $p <$   
265  $0.01$ ,  $n = 9$ ). This trend closely mirrored that seen with whole secretome. Osteogenic gene  
266 expression (Figure 5I) showed a consistent trend of marginally increased expression with CM-S  
267 treatment, which was further enhanced with CM-F. There was a near-significant increase of 1.5-  
268 fold in OPN ( $p = 0.051$ ,  $n = 17-18$ ) when comparing CM-S to Medium. CM-F resulted in  
269 significant changes compared to medium of 2.0-fold in COX2 ( $p < 0.05$ ,  $n = 17-18$ ), 1.8-fold in  
270 OCN ( $p < 0.05$ ,  $n = 14-15$ ), 2.0-fold in OPN ( $p < 0.001$ ,  $n = 16-18$ ) and 1.5-fold in RUNX2 ( $p <$   
271  $0.05$ ,  $n = 20$ ), with a near-significant increase of 2.6-fold in OSX ( $p = 0.07$ ,  $n = 21-23$ ). In  
272 addition, near-significant increases in OCN and OPN were detected comparing EV-F and EV-S.  
273 Moreover, orthology searches using the basic local alignment search tool BLAST [32] were  
274 performed for the human gene sequences (COX2, OCN, OPN, RUNX2, OSX) in the murine  
275 genome (version: *Mus musculus* GRCm38.p4). The bioinformatic tool, *in silico* PCR (UCSC  
276 Genome Browser), was used to confirm the lack of amplification of the human primer sequences  
277 in the murine genome [33], confirming that amplified genes are human, and not due to possible  
278 transfer of murine mRNA from the MLO-Y4 cell line. In summary, there is a trend of increasing  
279 osteogenesis in hMSC following EV-S treatment. However, this affect becomes significantly  
280 greater with EV-F treatment, showing a similar trend to that seen with whole secretome and  
281 demonstrates that EVs from mechanically- activated osteocytes are key drivers of stem/stromal  
282 cell recruitment and osteogenesis.

283

## 284 Discussion

285 Osteocytes are mechanosensitive cells which play a fundamental role in coordinating loading-  
286 induced bone formation via the secretion of paracrine factors which drive effector cell behaviour.  
287 One of the most important of which are bone marrow mesenchymal stem/stromal cells (MSCs)  
288 which are responsible for replenishing the bone forming osteoblast population. However, the  
289 exact mechanisms by which osteocytes relay mechanical signals to these cells are poorly  
290 understood. A greater understanding of these mechanisms would thus have profound  
291 implications for the development of therapies to treat the wide range of diseases with which the  
292 osteocyte has been linked, one of the most devastating of which is osteoporosis. Therefore, this

293 study aimed to demonstrate the potency of the mechanically stimulated osteocyte secretome in  
294 driving human MSC behaviour, and fully characterise its contents with the aim of identifying the  
295 key secreted factors regulating bone mechanobiology. Herein, we demonstrate that osteocytes  
296 subjected to oscillatory fluid shear secrete factors that significantly enhance hMSC recruitment  
297 and osteogenesis. To uncover the osteocyte derived secreted factors which drive hMSC  
298 behaviour, we performed a proteomic analysis of the osteocyte secretome to uncover an  
299 extensive map of proteins which are released both under static conditions and following  
300 mechanical stimulation. Over 300 proteins comprising the osteocyte secretome were identified  
301 with 34 proteins differentially expressed following mechanical stimulation. The osteocyte  
302 secretome was significantly enriched with proteins associated with extracellular vesicles (EVs)  
303 and exosomes indicating a role for secreted vesicles in mediated mechanically driven osteocyte-  
304 MSC communication. EVs were subsequently separated from the mechanical activated osteocyte  
305 secretome, characterised, and found to elicit similar trends in MSC recruitment and osteogenesis  
306 to that seen with conditioned media, demonstrating a key role for osteocyte EVs in mediating  
307 hMSC behaviour.

308  
309 Mechanically stimulated osteocytes secrete paracrine factors that recruit human MSCs and  
310 enhance osteogenesis. The ability of mechanically stimulated osteocytes to influence MSC  
311 behaviour is in agreement with previous findings *in vivo* where mechanical loading of bone  
312 results in the recruitment and osteogenic differentiation of endogenous [34] or transplanted  
313 exogenous osteoprogenitors [35]. Furthermore a similar trend in recruitment has been shown in  
314 murine MSCs where a 128% increase in recruitment was observed following exposure to  
315 conditioned media collected from osteocytes cultured on a rocking platform [10]. Interestingly in  
316 the same study, mechanically activated osteocyte conditioned media was also been shown to  
317 induce osteogenesis of MSCs as demonstrated by upregulation of *Opn* and *Cox-2* gene  
318 expression and enhanced mineral deposition [10, 11]. We have demonstrated a comparable  
319 increase in *COX-2* and *OPN* expression in human MSCs, as well as increases in *OCN*, *OSX* and  
320 *RUNX2*. These findings, along with other previous work investigating the effect of the osteocyte  
321 secretome on osteoblast proliferation, migration and osteogenesis [9, 36], further reinforce the  
322 importance of the osteocyte secretome and its contents in the indirect biophysical regulation of  
323 MSCs and loading-induced bone formation [37, 38].

324  
325 To determine the mechanisms by which osteocytes coordinate MSC recruitment and  
326 osteogenesis in response to loading, for the first time, we identified a detailed a map of the  
327 osteocyte secretome via a mass spectrometry based proteomic analysis. Interestingly, a number  
328 of key proteins, such as Sclerostin, which is known to be secreted by osteocytes, were not  
329 detected. This may due to the limitation of the MLO-Y4 osteocyte cell line but given the pro-  
330 osteogenic effect of this mechanically activated osteocyte secretome, this opens the possibility of  
331 identifying novel factors regulating MSC behaviour. We have identified several proteins from a  
332 previous proteomic analysis on osteocyte lysates [18], revealing potential roles for these proteins  
333 in cell signalling. Further analysis sought to investigate the role of mechanical forces on the  
334 contents of the osteocyte secretome, with differential expression of a range of proteins being  
335 identified compared to statically cultured cells. One Pfam group of particular interest which are  
336 significantly enriched with fluid shear are the 14-3-3 proteins. One study reports that 14-3-3 beta  
337 has a negative effect on osteogenesis, with downregulation in calvaria organ cultures resulting in  
338 increased bone formation [39]. 14-3-3 epsilon is released by osteoblasts/osteocytes in response to  
339 dynamic compression, inducing the release of catabolic factors in chondrocytes in a dose  
340 dependent manner, mimicking the effect of compression [40]. Interestingly, TAZ, a known  
341 mechanosensor and transcriptional modulator, has also been linked to 14-3-3 proteins, with  
342 decreased binding being shown to result in increased TAZ nuclear localisation [41], further  
343 indicating a role for 14-3-3 proteins in mechanically mediated signalling in bone. Other proteins  
344 of particular interest are histone H4 and annexin A5. The acetylation of histone H4 has been  
345 shown to promote the induction of osteocalcin gene expression in osteoblasts [42], with histone  
346 deacetylase inhibition being shown to promote osteoblast differentiation [43] and increase  
347 mineralisation [44]. More specifically, the C-terminus of histone H4, termed osteogenic growth  
348 peptide (OGP), a circulating stimulator of osteoblast activity [29], plays key roles in regulating  
349 the behaviour of bone residing cells, such as stimulating proliferation, phosphatase activity and  
350 mineralisation of osteoblasts and proliferation and osteogenic differentiation of MSCs [45].  
351 Annexin A5 has been shown to increase at the cell membrane in osteoblasts under fluid flow,  
352 with  $\text{Ca}^{2+}$  ion levels also being seen to increase. It was found that the disruption of annexin A5  
353 inhibited  $\text{Ca}^{2+}$  levels, implicating its role in calcium signalling [46], with its knockdown in  
354 osteoblasts impairing proliferation, ALP expression and Runx2 expression [47]. One

355 downregulated protein of interest is thrombospondin 2. The knockdown of this protein in mice  
356 increases angiogenesis [48] with endosteal bone formation being shown in another study to  
357 increase as a result of increased bone marrow derived osteoprogenitors [49]. Thrombospondin 2  
358 null mice have also demonstrated enhanced callus bone formation, vascularity and MSC  
359 proliferation following tibial fracture [50]. We have identified a list of proteins released by the  
360 osteocyte, many of which are mechanically regulated, and have been linked to bone physiology.  
361 This therefore represents a database of proteins to help better understand the osteocyte  
362 coordination of bone anabolism and catabolism and provides a list of potential therapeutic targets  
363 to mimic this behaviour.

364  
365 Functional enrichment analysis of the osteocyte secretome revealed a strong association with  
366 ‘extracellular exosome’ and ‘membrane bound vesicles’ with 66% of secreted proteins being  
367 linked to these cellular organelles. Moreover, in response to mechanical stimulation, 70% of the  
368 mechanically regulated proteins were associated with extracellular vesicles. EVs were  
369 successfully separated from osteocyte conditioned media and interestingly we did not detect any  
370 changes in EV morphology or quantity between static and dynamic groups, in contrast with  
371 previous work which has demonstrated an upregulation in EV number following fluid shear  
372 stimulation [51]. We have however demonstrated an almost identical trend in MSC recruitment  
373 with CM and EVs, both of which are enhanced following fluid shear, providing evidence for the  
374 key role of osteocyte derived EVs in mediating this response. Similarly, the almost identical  
375 trends in MSC osteogenic gene expression treated with CM and EVs further provide evidence for  
376 the role of osteocyte derived MAEVs in facilitating cell-cell communication in bone. Given the  
377 similar concentrations of EVs between groups, it is expected that this pro-osteogenic effect is a  
378 result of EV content changing in response to mechanical stimulation. Many of the proteins  
379 identified in this paper have also been identified in a proteomic analysis of osteoblast released  
380 EVs [31, 52]. A previous *in vivo* study has suggested a role for EVs in systemic signalling,  
381 demonstrating altered miRNA expression in EVs isolated from the plasma of osteocyte ablated  
382 mice and wild-type mice [24], while other studies have demonstrated the potential for EVs in  
383 therapeutics to enhance osteogenic gene expression [53], the use of drug loaded EVs for  
384 osteoporosis therapies [27], and the use of EVs for functionalisation of TE scaffolds to enhance  
385 bone regeneration [54, 55]. In addition to osteocyte derived MAEVs and the contents driving

386 MSC osteogenesis, MAEVs may also act as sites for mineral nucleation, as has previously been  
387 demonstrated in osteoblast EVs [56, 57]. Of particular interest in this regard is the enrichment of  
388 calcium ion binding (such as annexin A5) and phosphoserine binding (such as 14-3-3 proteins  
389 Ywhae and Ywhab) proteins in osteocyte MAEVs, which we have shown to be linked in a  
390 protein interaction network. Annexin A5 is linked to the calcium sensitive protein gelsolin [30],  
391 which in turn is linked to the 14-3-3 proteins via the phosphate regulating cofilin [58], both of  
392 which regulate changes in the actin cytoskeleton [30]. In addition to the known role of calcium  
393 ions in mineralisation, negatively charged amino acids such as phosphoserine are also known to  
394 play a key role in hydroxyapatite nucleation and growth [59]. Therefore osteocyte EVs may  
395 promote mineralisation via delivery of calcium and phosphate interacting proteins through  
396 interaction with gelsolin and cofilin respectively. Taken together, we have identified  
397 mechanically activated extracellular vesicles as a key mechanism by which osteocyte  
398 communicate chemotactic and osteogenic signals to osteoprogenitors in response to loading,  
399 highlighting these osteocyte derived MAEVs as a potential cell free therapy to mimic the  
400 beneficial effect of loading and enhance bone formation.

401  
402 One of the limitations of this study is the use of the MLO-Y4 cell line. While these cells largely  
403 behave as osteocytes *in vivo*, releasing various characteristic signalling molecules and mediating  
404 bone cell behaviour [60, 61], they lack several characteristics such as the typical absence of  
405 sclerostin expression and low DMP-1 expression [62]. In spite of these limitations, we have  
406 demonstrated the potent effect this cell can have on hMSC osteogenesis and have identified  
407 novel factors which are released to achieve this. These cells are also well characterised in the  
408 literature, allowing direct comparison of results with a wide range of studies.

409  
410 In summary this study presents evidence that the mechanically stimulated osteocyte secretes  
411 factors which coordinates MSC recruitment and osteogenesis demonstrating a mechanism  
412 required for loading-induced bone formation. Importantly, for the first time, we have mapped the  
413 osteocyte protein secretome and determined how this is altered in response to mechanical  
414 stimulation generating a database of potential factors mediating this mechanism. Lastly, this  
415 study also demonstrates the presence and fundamental role of mechanically activated EVs  
416 (MAEVs) released by osteocytes in coordinating MSC recruitment and osteogenesis, identifying

417 a novel mechanism by which osteocytes coordinate bone mechanobiology. Moreover, these pro-  
418 osteogenic osteocyte derived MAEVs represent a potential cell-free therapy to enhance bone  
419 regeneration and repair in diseases such as osteoporosis.

420

## 421 **Materials and Methods**

### 422 **Cell culture**

423 MLO-Y4 osteocyte like cells (Kerafast) [63] were cultured, as previously described [64], in  $\alpha$ -  
424 MEM growth medium with 2.5% fetal bovine serum (FBS), 2.5% calf serum (CS), 1%  
425 penicillin/streptomycin (PS) and 1% L-glutamine during static culture and fluid shear  
426 stimulation. For whole secretome/conditioned medium (CM) studies, cells were cultured in  $\alpha$ -  
427 MEM with 1% PS and 1% L-glutamine. hMSCs were isolated from bone marrow (Lonza),  
428 characterised by tri-lineage differentiation (data not shown), and maintained in Dulbecco's  
429 Modified Eagle Medium (DMEM) with 10% FBS and 1% PS unless otherwise stated. All cells  
430 were cultured at 37°C and 5% CO<sub>2</sub>.

431

### 432 **Mechanical stimulation and conditioned medium collection**

433 48 h prior to fluid shear application, 75 x 38 mm glass slides were coated with 0.15mg/ml type I  
434 collagen (Sigma C3867) for one hour and washed with PBS, after which osteocytes were seeded  
435 at a density of  $1.16 \times 10^4$  cells/cm<sup>2</sup>. Glass slides were transferred to custom made parallel plate  
436 flow chambers (PPFC) as previously described [65]. Each glass slide was assembled within an  
437 individual PPFC under sterile conditions and incubated at 37°C and 5% CO<sub>2</sub>. Cells in PPFCs  
438 were either subjected to a fluid shear stress of 1 Pa at a frequency of 1 Hz, or maintained in the  
439 PPFC under static conditions, with each condition completed in quadruplicate. After two hours  
440 of treatment, slides were transferred to culture dishes, washed with PBS, and 2.5 ml of serum-  
441 free medium was applied. A control group consisting of collagen-coated glass slides with no  
442 cells was also incubated with 2.5 ml of serum-free medium. All culture dishes were incubated for  
443 24 h and medium was collected from cells which had undergone fluid shear (CM-F), statically  
444 cultured cells (CM-S) and from cell-free slides with collagen coating (Medium). Samples were  
445 centrifuged at 3,000g for 10 mins at 4°C to remove debris, after which the supernatant was  
446 collected and stored at -80°C prior to use (Figure 2A).

447 Chemotaxis of hMSCs was assessed using Boyden chambers with a pore size of 8  $\mu\text{m}$  (Merck  
448 Millipore, PIEP12R48). Cells were seeded on the upper membrane in serum free  $\alpha$ -MEM  
449 medium at a density of 30,000 cells/cm<sup>2</sup> and allowed to adhere 4 h before being transferred to the  
450 wells containing chemotactant (Medium (serum free), CM-S, CM-F, Medium + 10% FBS). Cells  
451 were then cultured for a further 18 h, fixed with 10% formalin solution and stained with  
452 haematoxylin. Light microscopy was used to determine the number of migrated cells, which was  
453 then normalised to Medium for each group.

454

### 455 **Effect of osteocyte conditioned media on bone marrow mesenchymal stem/stromal cell** 456 **osteogenesis**

457 hMSC cells were seeded in 6-well plates at a density of 6,500 cells/cm<sup>2</sup> and cultured for 24 h.  
458 Osteocyte CM (CM-S, CM-F) was then applied and hMSCs were cultured for a further 24 h after  
459 which time cells were lysed with tri-reagent (Sigma Aldrich) and mRNA isolated as per the  
460 manufacturer's protocol. RNA concentration was measured using a Nanodrop spectrophotometer  
461 and sample purity was checked via 260/280 and 260/230 absorbance ratios. 200 ng RNA was  
462 reverse transcribed to cDNA using a High-Capacity cDNA Reverse Transcription Kit (Applied  
463 Biosystems). Commercially available primers (Sigma Aldrich, KSPQ12012) were used to  
464 determine levels of cyclooxygenase 2 (COX2), osteocalcin (OCN), osteopontin (OPN), runt-  
465 related transcription factor 2 (RUNX2) and osterix (OSX) (Table S 1). qPCR was performed  
466 using a reaction volume of 20  $\mu\text{l}$  containing 10  $\mu\text{l}$  SYBR green PCR MasterMix (Invitrogen Ltd,  
467 Paisley, UK), 0.8  $\mu\text{l}$  of each forward and reverse primer, and 8.4  $\mu\text{l}$  DNase free water. Plates  
468 were run on an ABI 7500 Fast real-time PCR system (Life Technologies, Carlsbad, CA, USA).

469

### 470 **Sample preparation for MS analysis**

471 Protein precipitation was carried out with 1ml of each sample (Medium, CM-S, CM-F) using  
472 trichloroacetic acid (TCA), and, following centrifugation at 18,500 g, the pellet re-suspended in  
473 6M urea in 50mM ammonium bicarbonate. Samples were reduced with 5 mM dithiothreitol for  
474 30min at 60°C and alkylated with 10mM iodoacetamide for 30min at room temperature in the  
475 dark, after which ammonium bicarbonate was added to bring the concentration of urea to 1.8M.  
476 The reduced and alkylated proteins were then digested overnight with trypsin at a ratio of 1:50  
477 w/w trypsin to protein at 37°C and 350 rpm on a Thermomixer. Digestion was then stopped with



478 8.8M hydrochloric acid. Peptides were bound and desalted using C18 ZipTips (Merck Millipore)  
479 and washed with 0.1% trifluoroacetic acid (TFA) before being re-suspended in 10  $\mu$ l elution  
480 solution (50% acetonitrile in 0.1% TFA). Samples were concentrated using a SpeedVac vacuum  
481 concentrator until roughly 4  $\mu$ l remained, before being re-suspended in 20  $\mu$ l 0.5% acetic acid  
482 (Figure 2B).

483

#### 484 **LC MS/MS analysis**

485 Biological samples (n=3) were run with two technical replicates on a Thermo Scientific Q  
486 Exactive mass spectrometer connected to a Dionex Ultimate 3000 (RSLCnano) chromatography  
487 system. Each sample was loaded onto a fused silica emitter (75  $\mu$ m ID, pulled using a laser puller  
488 (Sutter Instruments P2000)), packed with UChrom C18 (1.8  $\mu$ m) reverse phase media  
489 (nanoLCMS Solutions LCC) and was separated by an increasing acetonitrile gradient over 47/60  
490 minutes at a flow rate of 250 nL/min. The MS was operated in positive ion mode with a capillary  
491 temperature of 320°C, and with a potential of 2300V applied to the frit. All data was acquired  
492 with the MS operating in automatic data dependent switching mode. A high resolution (70,000)  
493 MS scan (300-1600 m/z) was performed using the Q Exactive to select the 8 most intense ions  
494 prior to MS/MS analysis using high-energy collision dissociation (HCD).

495

#### 496 **MS data analysis**

497 Raw data from MS analysis was processed using MaxQuant software [66, 67] version 1.5.5.1  
498 and spectra searched using the built in Andromeda search engine [68] with the Uniprot FASTA  
499 validated *Mus musculus* database being used as the forward database and the reverse for the  
500 decoy search being generated within the software. A minimum six amino acid length criteria was  
501 applied and the FDR for MS data analysis was set to 1% at the peptide and protein level.  
502 Cysteine carbamidomethylation was included as a fixed modification and oxidation of  
503 methionine and protein N-terminal acetylation were set as variable modifications for the peptide  
504 search. The “match between runs” algorithm was used to transfer peptide identifications between  
505 MS runs where possible to increase total number of protein hits. At least one unique or razor  
506 peptide was required per protein group for identification. Label-free quantification (LFQ) was  
507 carried out using the MaxLFQ algorithm [69] within the software, with Fast LFQ being disabled.  
508 Other settings were kept as default in the software.

509

## 510 **Extracellular vesicle isolation from conditioned media**

511 Medium from statically and dynamically cultured osteocytes was collected and centrifuged at  
512 3000 g for 10 min to remove debris. Medium was then filtered through a 0.45 µm pore filter.  
513 Medium was subsequently ultracentrifuged at 110,000 g for 75 min at 4°C, using an SW32.Ti  
514 swing bucket rotor. Collected EV pellets were washed in PBS and the ultracentrifugation process  
515 was repeated.

516

## 517 **Characterisation of extracellular vesicles**

### 518 *TEM imaging*

519 EV imaging was conducted via a JEOL JEM1400 transmission electron microscope (TEM)  
520 coupled with an AMT XR80 digital acquisition system. Samples were physiosorbed to 200 mesh  
521 carbon-coated copper formvar grids and negatively stained with 1% uranyl acetate.

522

### 523 *Immunoblotting*

524 For immunoblotting, cell pellets and EVs were lysed using cell extraction buffer (Invitrogen,  
525 Carlsbad, CA, USA) supplemented with protease inhibitor cocktail (Roche, Basel, Switzerland).  
526 Protein quantification was performed using Bio-Rad protein assay (Bio-Rad, Hercules, CA,  
527 USA). Cellular and EV protein (8µg) were resolved on 10% SDS gels and transferred to PVDF  
528 membranes (BioRad). Blots were incubated at 4°C overnight with primary antibodies to GRP-94  
529 (Cell Signalling, 1:2000 dilution), TSG101 (Abcam, 1:1000 dilution) and PDC6I/ALIX (Abcam,  
530 1:1000 dilution). Secondary antibodies were incubated for 1hr at room temperature and  
531 developed using Immobilon Western Chemiluminescent HRP substrate (Millipore, MA, USA).

532

### 533 *Quantification of EV content in conditioned medium*

534 As a surrogate of EV quantities, protein contents were measured using a BCA protein assay kit  
535 (Thermo Scientific, 23227). BSA standards (10 µl) were added to a 96 well plate after which 200  
536 µl of working reagent was added (50:1 ratio of reagents A & B). EV samples were diluted in  
537 CST lysis buffer (Cell Signaling Technology, 9803), vortexed, and incubated for 1 hr on ice. 10  
538 µl of sample lysates were added to the plate and mixed with 200 µl of working reagent. The plate  
539 was incubated for 30 min at 37°C and absorbance read on a spectrophotometer at 562 nm. BCA

540 assay results combined with the volume of the isolate were used to calculate the total quantity of  
541 protein in the EV isolates and this value was used to calculate the original concentration of EV  
542 protein in the conditioned medium.

543

#### 544 *Particle size analysis*

545 Particle size analysis was performed on EV samples using a NTA NS500 system (NanoSight,  
546 Amesbury, UK). EV samples were diluted 1:50 in PBS and injected into the NTA system, which  
547 obtained 4 x 40 second videos of the particles in motion. Videos were then analysed with the  
548 NTA software to determine particle size.

549

#### 550 **Uptake of EVs by MSCs**

551 For fluorescent labelling, 2  $\mu\text{g}$  of EVs were incubated with 2  $\mu\text{M}$  PKH26 dye solution  
552 (PKH26GL, Sigma) for 5 mins, after which staining was inhibited via addition of 1% BSA  
553 solution for 1 minute. Labelled EVs were pelleted, the excess dye solution aspirated, and washed  
554 twice with culture medium. hMSCs were seeded at a density of 10,000 cells/cm<sup>2</sup> in Nunc glass-  
555 bottomed dishes (150680, Thermo Fisher) and cultured for 24 h. Cells were washed with PBS  
556 before being incubated with either PKH26-labelled EVs or a dye control containing no PBS with  
557 no EVs. Cells were fixed after 18 h and stained with Alexa Fluor 488 phalloidin (1:40) (A12379,  
558 Thermo Fisher) and DAPI (1:2000) (D9542, Sigma) to label the actin cytoskeleton and nuclei  
559 before mounting with Fluoroshield (F6182, Sigma) and imaged using confocal microscopy.

560

#### 561 **Statistical and bioinformatics analysis**

562 Statistical analysis on recruitment and gene expression data was carried out using using one-way  
563 ANOVA and Bonferroni's multiple comparison post-test (\* $p < 0.05$ , \*\* $p < 0.01$ ,  
564 \*\*\* $p < 0.001$ . &&&  $p < 0.001$  of positive control compared to all other groups).

565

566 Bioinformatic analysis was performed using Perseus 1.5.5.3 [70] to analyse LFQ data from  
567 MaxQuant. Potential contaminants, proteins identified in the decoy reverse database and proteins  
568 identified only by site modification were omitted. LFQ values were transformed using a  $\log_2(x)$   
569 function. For clustering and principal component analysis (PCA), imputation was carried out  
570 (width = 0.3, down shift = 1.8) where missing values were replaced by values from a normal

571 distribution. For hierarchical clustering, log transformed intensities were normalised by z-score  
572 and clustered using the Euclidean distance method for both columns and rows. Pathway  
573 enrichment analysis of clusters was carried out using a Fisher's exact test with the Benjamini-  
574 Hochberg FDR threshold set to 5%, with gene ontology cellular component (GOCC), biological  
575 process (GOBP), molecular function (GOMF) and UniProt keywords being analysed for  
576 enrichment. A Student's T-Test with a permutation-based FDR (1, 15, 40%) was carried out to  
577 identify differences in expression of proteins between groups, and volcano plots constructed with  
578 difference (log<sub>2</sub> fold change) on the x-axis and significance (-log<sub>10</sub> transformed) on the y-axis.  
579 The difference on the x-axis corresponds to the difference between the mean expression values  
580 of log<sub>2</sub> transformed data, where a difference of n corresponds to fold change of 2<sup>n</sup>. Pathway  
581 enrichment analysis was carried out these significantly upregulated proteins using the Fisher's  
582 exact test with Benjamini-Hochberg FDR cut-off of 5%. Results were represented as word  
583 clouds, with the size of the word representing degree of enrichment and colour representing FDR  
584 corrected p value. All terms with a minimum of 0.5 enrichment factor were included. StringDB  
585 [71] was used to generate protein-protein interaction networks of differentially-expressed  
586 proteins and perform functional enrichment analysis of gene ontology and protein family (Pfam)  
587 terms. For further analysis between CM-S and CM-F groups, only proteins that were identified in  
588 all three biological replicates if at least one of the groups were considered for further analysis.

589

590

591

592

593

594

595

596

597

598

599

600

601 **Figures and Tables**

602

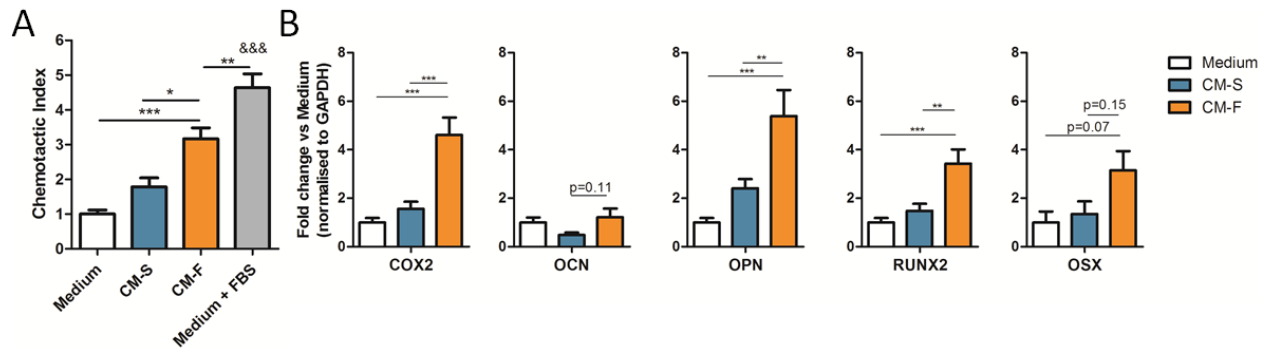

603

604 **Figure 1 Role of osteocyte conditioned medium on hMSC osteogenesis.** Migration of hSSCs towards  
605 osteocyte conditioned medium and normalised to Medium, showing significant increases in chemotactic  
606 index towards CM-F medium when compared to CM-S (n=9) (A). qPCR analysis of COX-2, OCN, OPN,  
607 RUNX2 and OSX expression in hMSCs treated with osteocyte medium from CM-S and CM-F (n=4-6)  
608 (B). Statistical analysis using one-way ANOVA and Bonferroni's multiple comparison post-test for  
609 chemotactic index (\* $p < 0.05$ , \*\* $p < 0.01$ , \*\*\* $p < 0.001$ , &&&  $p < 0.001$  vs Medium and EV-S).

610

611

612

613

614

615

616

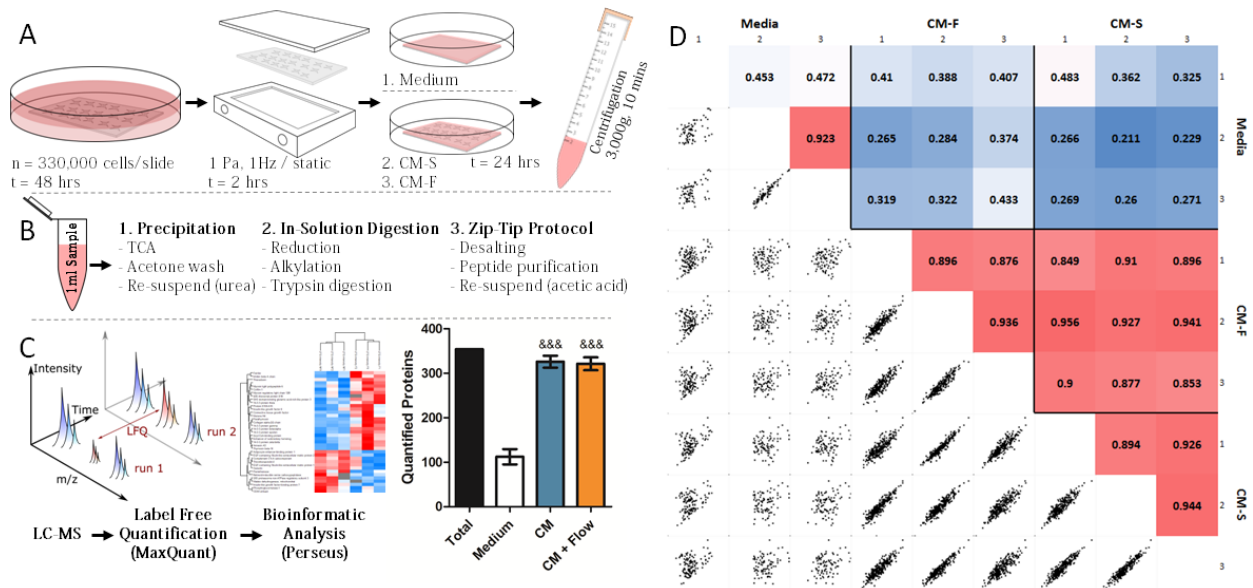

617  
 618 **Figure 2 Outline of experiment procedure.** MLO-Y4 cells were seeded to collagen coated glass slides  
 619 and cultured for 48 hours (A), before being transferred to parallel plate flow chambers for dynamic (OFF,  
 620 1Pa, 1Hz, 2hrs) or static culture. The slides were then transferred to culture dishes and 2.5ml of serum  
 621 free medium was applied, with a control group being present with collagen coated glass slides without  
 622 cells. The serum free medium was collected and centrifuged to remove debris. 1ml of each sample was  
 623 collected, and proteins were precipitated and digested in solution before being purified via C18 stage tips  
 624 (B). Samples were analysed via LC-MS, and label free quantification was carried out in MaxQuant before  
 625 a bioinformatic analysis was completed in Perseus (&&& p < 0.001 vs Medium using one-way ANOVA  
 626 and Bonferroni's multiple comparison post-test )(C). Pearson correlations between technical replicates,  
 627 biological replicates and sample groups were determined, with correlations between biological replicates  
 628 with combined technical replicates shown (D).

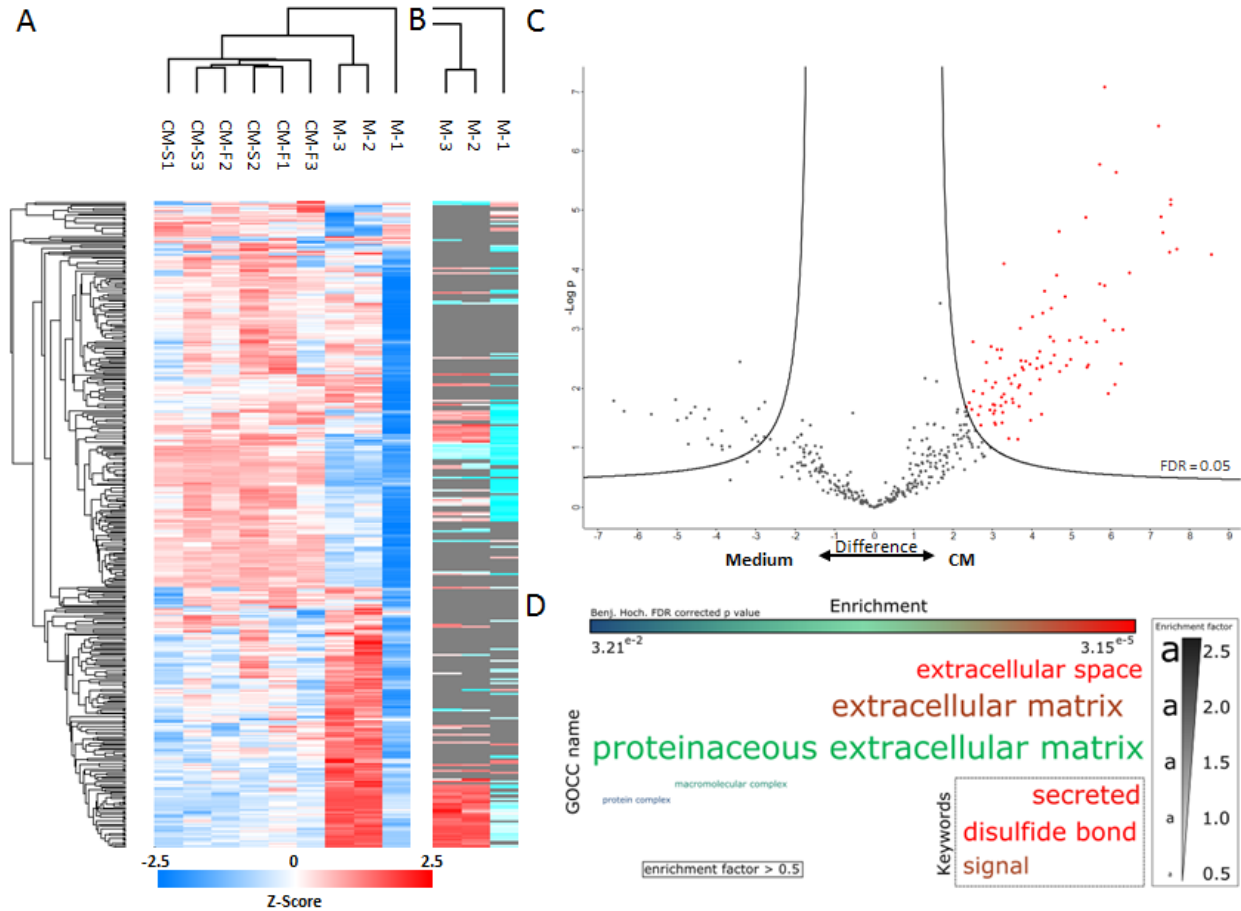

629  
 630 **Figure 3 Proteomic analysis of the osteocyte secretome.** Hierarchical clustering of all samples with  
 631 imputed data (A) and hierarchical clustering in the control samples without imputation of data (B).  
 632 Volcano plot illustrating proteins significantly upregulated proteins marked in red in CM-S and CM-F  
 633 groups compared to the control (C). Enrichment analysis of GOCC terms and Uniprot keywords in  
 634 upregulated proteins using Fisher's exact test represented as a word cloud (D). The size of the word  
 635 represents enrichment of terms, while colour represents FDR corrected p value. All terms with a  
 636 minimum of 0.5 enrichment factor and 0.05 FDR corrected p value were included.

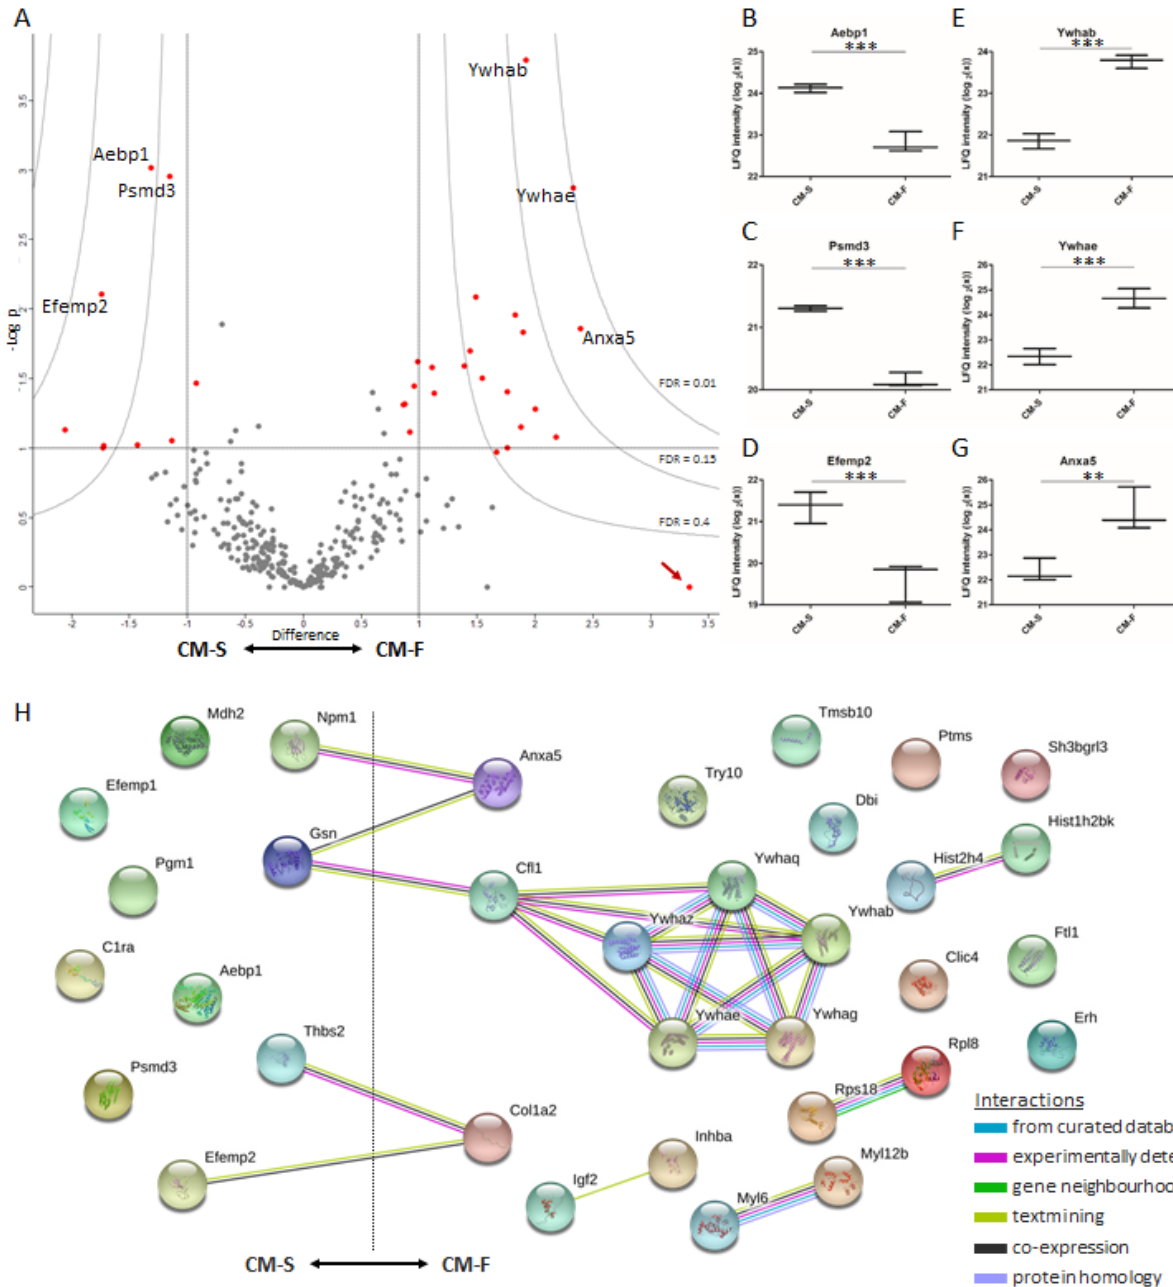

637

638 **Figure 4 Quantifying differences between the static and dynamic osteocyte secretome.** Volcano plot

639 (A), illustrating upregulation with flow to the right and downregulation to the left. The y-axis displays the

640  $-\log_{10}$  of p-value, where the horizontal line corresponding to a p-value of 0.1. Vertical lines indicate a

641 log<sub>2</sub> fold change of  $\pm 1$ . Curves illustrate indicated FDR values with S0 parameter set to 2. Whisker plots

642 of three significantly upregulated proteins in the presence of fluid flow are indicated (B-D). The arrow

643 indicates a protein which displays low significance due to being present in only one of the CM replicates.

644 String DB network illustrating interactions between mechanically regulated proteins, with significant

645 degree of protein-protein interaction ( $p < 10^{-3}$ ) (H).



646 **Table 1 Differentially expressed proteins between CM-S and CM-F groups.** \*p<0.1, \*\*p<0.05,  
 647 \*\*\*p<0.01 and + indicates proteins with only a single or no detection in CM-S group (top of table) and no  
 648 detection in CM-F group (bottom of table) where p-value cannot be defined.

| Gene Name        | Protein                                        | Mol. Weight<br>[kDa] | Difference<br>[Log <sub>2</sub> fold change] | p-value summary |
|------------------|------------------------------------------------|----------------------|----------------------------------------------|-----------------|
| <b>Rpl8</b>      | 60S ribosomal protein L8                       | 28.024               | 0                                            | +               |
| <b>Clic4</b>     | Chloride intracellular channel protein 4       | 28.729               | 3.328                                        | +               |
| <b>Anxa5</b>     | Annexin A5                                     | 35.752               | 2.390                                        | **              |
| <b>Ywhae</b>     | 14-3-3 protein epsilon                         | 29.174               | 2.327                                        | ***             |
| <b>Rps18</b>     | 40S ribosomal protein S18                      | 12.483               | 2.177                                        | *               |
| <b>Hist2h4</b>   | Histone H4                                     | 11.367               | 2.001                                        | *               |
| <b>Ywhab</b>     | 14-3-3 protein beta/alpha                      | 28.086               | 1.917                                        | ***             |
| <b>Ywhaz</b>     | 14-3-3 protein zeta/delta                      | 27.771               | 1.892                                        | **              |
| <b>Dbi</b>       | Acyl-CoA-binding protein                       | 10.000               | 1.878                                        | *               |
| <b>Ywhag</b>     | 14-3-3 protein gamma                           | 28.302               | 1.827                                        | **              |
| <b>Try10</b>     | MCG140784                                      | 26.221               | 1.762                                        | **              |
| <b>Igf2</b>      | Insulin-like growth factor II                  | 11.107               | 1.760                                        | *               |
| <b>Hist1h2bk</b> | Histone H2B                                    | 13.920               | 1.666                                        |                 |
| <b>Ptms</b>      | Parathyrosin                                   | 11.430               | 1.541                                        | **              |
| <b>Sh3bgrl3</b>  | SH3 domain-binding glutamic acid-rich-         | 10.477               | 1.489                                        | ***             |
| <b>Ywhaq</b>     | 14-3-3 protein theta                           | 32.221               | 1.434                                        | **              |
| <b>Tmsb10</b>    | Thymosin beta-10                               | 5.026                | 1.387                                        | **              |
| <b>Erh</b>       | Enhancer of rudimentary homolog                | 12.259               | 1.126                                        | **              |
| <b>Ftl1</b>      | Ferritin;Ferritin light chain 1;Ferritin light | 20.772               | 1.110                                        | **              |
| <b>Inhba</b>     | Inhibin beta A chain                           | 47.392               | 0.986                                        | **              |
| <b>Myl12b</b>    | Myosin regulatory light chain 12B              | 19.895               | 0.954                                        | **              |
| <b>Myl6</b>      | Myosin light polypeptide 6                     | 16.930               | 0.918                                        | *               |
| <b>Col1a2</b>    | Collagen alpha-2(I) chain                      | 129.560              | 0.874                                        | **              |
| <b>Cfl1</b>      | Cofilin-1                                      | 18.559               | 0.861                                        | **              |
| <b>Gsn</b>       | Gelsolin                                       | 85.941               | -0.925                                       | **              |
| <b>Pgm1</b>      | Phosphoglucomutase-1                           | 61.417               | -1.135                                       | *               |
| <b>Psm3</b>      | 26S proteasome non-ATPase regulatory           | 60.718               | -1.158                                       | ***             |
| <b>Aebp1</b>     | Adipocyte enhancer-binding protein 1           | 128.360              | -1.319                                       | ***             |
| <b>C1ra</b>      | Complement C1r-A subcomponent                  | 80.072               | -1.437                                       | *               |
| <b>Thbs2</b>     | Thrombospondin-2                               | 129.880              | -1.723                                       | *               |
| <b>Efemp1</b>    | EGF-containing fibulin-like extracellular      | 54.952               | -1.732                                       | *               |
| <b>Efemp2</b>    | EGF-containing fibulin-like extracellular      | 49.425               | -1.743                                       | ***             |
| <b>Mdh2</b>      | Malate dehydrogenase, mitochondrial            | 35.611               | -2.056                                       | *               |
| <b>Npm1</b>      | Nucleophosmin                                  | 28.385               | 0                                            | +               |

649

650

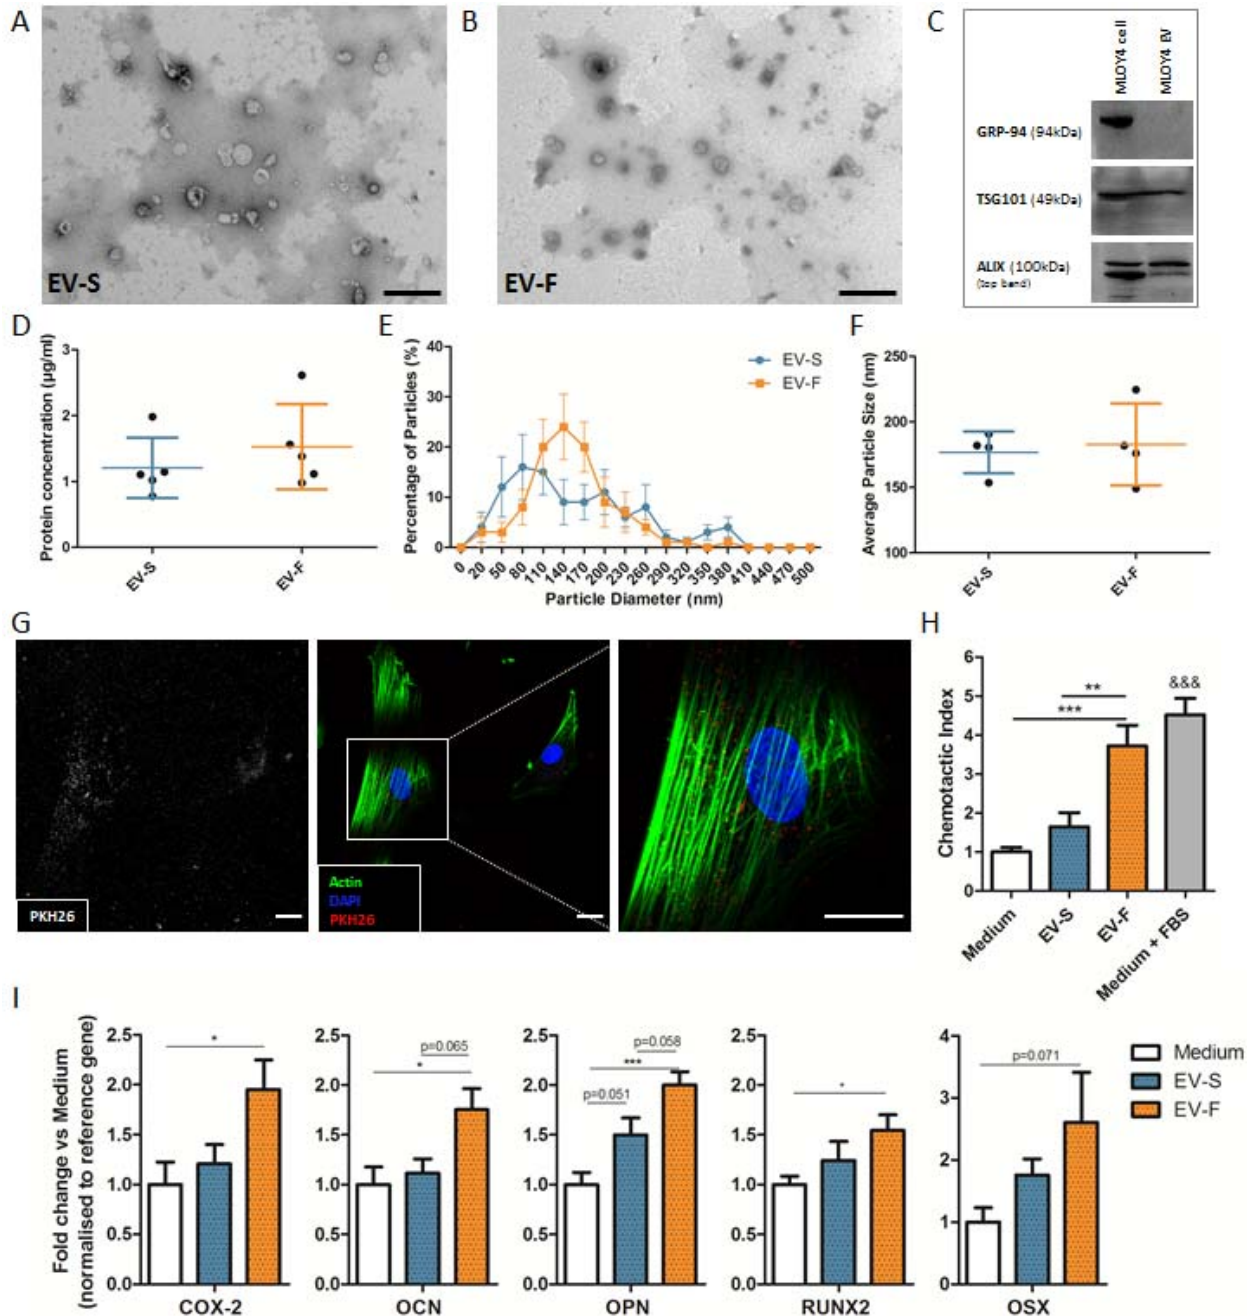

651  
652

653 **Figure 5 Characterisation of EVs and their influence on hMSC osteogenesis.** TEM image of EVs  
654 isolated from osteocyte CM-S (A) and CM-F (B). Immunoblots confirmed the presence of EVs via  
655 negative marker GRP-94 and positive markers TSG101 and ALIX (C). Protein concentration of EVs in  
656 conditioned medium groups (n=5) (D). Nanoparticle size analysis on EVs confirmed no significant  
657 difference in distribution (E) or average size (F) between groups (n=4). Immunofluorescent images  
658 illustrating osteocyte EV uptake by hSSCs, as demonstrated by localisation of PKH26 labelled EVs  
659 within the cell body (Scale = 10µm) (G). Migration of hSSCs towards EVs isolated from osteocyte

660 conditioned medium and normalised to Medium, showing significant increases in chemotactic index  
661 towards CM-F medium when compared to CM-S (H). qPCR analysis of COX-2, OCN, OPN, RUNX2  
662 and OSX expression in hSSCs treated with EVs from osteocyte medium from CM-S and CM-F (I).  
663 Statistical analysis using using one-way ANOVA and Bonferroni's multiple comparison post-test  
664 (\* $p < 0.05$ , \*\* $p < 0.01$ , \*\*\* $p < 0.001$ , &&&  $p < 0.001$  vs Medium and EV-S)

665

666

667

668

669

670

671

672

673

674

675

676

677

678

679

680

681

682

683

684

685

686

687

688

689 **Supplementary figures and tables**

690 **Table S 1** Primer sequences and concentrations employed in quantitative PCR analysis.

| Gene symbol | Tm (°C) | Primer concentration | Sequence              | Amplicon size |
|-------------|---------|----------------------|-----------------------|---------------|
| 18s         | 60      | 300 nM               | ATCGGGGATTGCAATTATTC  | 130bp         |
|             |         |                      | CTCACTAAACCATCCAATCG  |               |
| GAPDH       | 60      | 300 nM               | ACAGTTGCCATGTAGACC    | 95bp          |
|             |         |                      | TTTTTGTTGAGCACAGG     |               |
| COX2        | 60      | 400 nM               | AAGCAGGCTAATACTGATAGG | 113bp         |
|             |         |                      | TGTTGAAAAGTAGTTCTGGG  |               |
| OCN         | 65      | 400 nM               | CACTCCTCGCCCTATTGGC   | 112bp         |
|             |         |                      | CCCTCCTGCTTGACACAAAG  |               |
| OPN         | 60      | 400 nM               | GACCAAGGAAACTCACTAC   | 84bp          |
|             |         |                      | CTGTTAACTGGTATGGCAC   |               |
| RUNX2       | 60      | 400 nM               | GCAGTATTACAACAGAGGG   | 112bp         |
|             |         |                      | TCCCAAAGAAGTTTGCTG    |               |
| OSX         | 60      | 400 nM               | TGAGGAGGAAGTTCATATG   | 200bp         |
|             |         |                      | CATTAGTGCTTGTAAGGGG   |               |

691

692

693 **Table S 2** Functional enrichments in CM proteins indicated in Figure 3C using String DB, with observed  
 694 gene count out of a total of 105 genes and FDR cut-off of 2%. (note: 105 genes were identified from 97  
 695 proteins)  
 696

| Pathway description                                                    | Observed gene count | False discovery rate (FDR) |
|------------------------------------------------------------------------|---------------------|----------------------------|
| <u>GOCC (Gene Ontology Cellular Component)</u>                         |                     |                            |
| extracellular exosome                                                  | 71                  | 1.72E-41                   |
| extracellular region part                                              | 76                  | 5.05E-39                   |
| extracellular region                                                   | 77                  | 1.20E-35                   |
| membrane-bounded vesicle                                               | 70                  | 2.07E-34                   |
| extracellular space                                                    | 47                  | 7.88E-32                   |
| extracellular matrix                                                   | 26                  | 9.57E-22                   |
| proteinaceous extracellular matrix                                     | 22                  | 5.85E-18                   |
| cytoplasmic membrane-bounded vesicle                                   | 26                  | 1.80E-12                   |
| cytoplasmic vesicle                                                    | 24                  | 9.53E-10                   |
| myelin sheath                                                          | 12                  | 9.48E-09                   |
| <u>GOBP (Gene Ontology Biological Process)</u>                         |                     |                            |
| response to stress                                                     | 36                  | 6.92E-07                   |
| antigen processing and presentation of peptide antigen via MHC class I | 6                   | 4.09E-06                   |
| protein folding                                                        | 10                  | 8.52E-06                   |
| response to wounding                                                   | 13                  | 2.05E-05                   |
| regulation of biological process                                       | 63                  | 5.41E-05                   |
| pyruvate metabolic process                                             | 6                   | 1.73E-04                   |
| extracellular matrix organization                                      | 9                   | 1.73E-04                   |
| biological regulation                                                  | 63                  | 1.99E-04                   |
| glycolytic process                                                     | 5                   | 2.85E-04                   |
| response to endogenous stimulus                                        | 19                  | 2.85E-04                   |
| <u>GOMF (Gene Ontology Molecular Function)</u>                         |                     |                            |
| protein complex binding                                                | 20                  | 7.80E-09                   |
| protein binding                                                        | 52                  | 7.85E-09                   |
| binding                                                                | 73                  | 5.31E-08                   |
| RNA binding                                                            | 26                  | 3.35E-07                   |
| poly(A) RNA binding                                                    | 23                  | 3.35E-07                   |
| isomerase activity                                                     | 9                   | 9.02E-06                   |
| macromolecular complex binding                                         | 21                  | 1.05E-05                   |
| receptor binding                                                       | 20                  | 1.22E-05                   |
| calcium ion binding                                                    | 15                  | 1.22E-05                   |
| peptide binding                                                        | 9                   | 1.90E-05                   |

697

698 **Table S 3** Functional enrichments in network using String DB with observed gene count out of a total of  
 699 34 genes and FDR cut-off of 2%.

| Pathway description                            | Observed gene count | False discovery rate (FDR) | Associated proteins in network                                                                                                                                |
|------------------------------------------------|---------------------|----------------------------|---------------------------------------------------------------------------------------------------------------------------------------------------------------|
| <b>GOCC (Gene Ontology Cellular Component)</b> |                     |                            |                                                                                                                                                               |
| extracellular region                           | 26                  | 1.16E-11                   | Aebp1,Anxa5,C1ra,Cfl1,Clic4,Col1a2,Dbi,Efemp1,Efemp2,Ftl1,Gsn,Hist1h2bk,Hist2h4,Igf2,Inhba,Mdh2,Myl12b,Myl6,Pgm1,Psmd3,Sh3bgrl3,Thbs2,Ywhab,Ywhae,Ywhag,Ywhaz |
| membrane-bounded vesicle                       | 24                  | 1.16E-11                   | Aebp1,Anxa5,C1ra,Cfl1,Clic4,Col1a2,Dbi,Efemp1,Efemp2,Ftl1,Gsn,Hist2h4,Igf2,Mdh2,Myl12b,Myl6,Pgm1,Psmd3,Sh3bgrl3,Thbs2,Ywhab,Ywhae,Ywhag,Ywhaz                 |
| extracellular region part                      | 25                  | 1.16E-11                   | Aebp1,Anxa5,C1ra,Cfl1,Clic4,Col1a2,Dbi,Efemp1,Efemp2,Gsn,Hist1h2bk,Hist2h4,Igf2,Inhba,Mdh2,Myl12b,Myl6,Pgm1,Psmd3,Sh3bgrl3,Thbs2,Ywhab,Ywhae,Ywhag,Ywhaz      |
| extracellular exosome                          | 22                  | 1.16E-11                   | Aebp1,Anxa5,C1ra,Cfl1,Clic4,Col1a2,Dbi,Efemp1,Efemp2,Gsn,Hist2h4,Igf2,Mdh2,Myl12b,Myl6,Pgm1,Psmd3,Sh3bgrl3,Ywhab,Ywhae,Ywhag,Ywhaz                            |
| focal adhesion                                 | 9                   | 2.88E-07                   | Anxa5,Cfl1,Gsn,Npm1,Rpl8,Ywhab,Ywhae,Ywhag,Ywhaz                                                                                                              |
| extracellular space                            | 12                  | 3.20E-06                   | Aebp1,Anxa5,C1ra,Cfl1,Col1a2,Dbi,Efemp1,Gsn,Hist1h2bk,Igf2,Inhba,Ywhaz                                                                                        |
| cytosol                                        | 13                  | 2.65E-05                   | Cfl1,Clic4,Gsn,Npm1,Pgm1,Ptms,Rpl8,Rps18,Ywhab,Ywhae,Ywhag,Ywhaq,Ywhaz                                                                                        |
| cytoplasmic vesicle part                       | 7                   | 1.04E-04                   | Clic4,Ftl1,Ywhab,Ywhae,Ywhag,Ywhaq,Ywhaz                                                                                                                      |
| cytoplasmic membrane-bounded vesicle           | 9                   | 3.24E-04                   | Clic4,Dbi,Ftl1,Thbs2,Ywhab,Ywhae,Ywhag,Ywhaq,Ywhaz                                                                                                            |
| cytoplasmic vesicle membrane                   | 6                   | 5.14E-04                   | Clic4,Ywhab,Ywhae,Ywhag,Ywhaq,Ywhaz                                                                                                                           |
| blood microparticle                            | 4                   | 6.77E-04                   | Anxa5,C1ra,Gsn,Ywhaz                                                                                                                                          |
| cell junction                                  | 9                   | 1.06E-03                   | Cfl1,Clic4,Gsn,Npm1,Rpl8,Ywhab,Ywhae,Ywhag,Ywhaz                                                                                                              |
| macromolecular complex                         | 16                  | 4.47E-03                   | Clic4,Col1a2,Ftl1,Gsn,Hist1h2bk,Hist2h4,Inhba,Myl12b,Myl6,Npm1,Psmd3,Rps18,Ywhab,Ywhae,Ywhaq,Ywhaz                                                            |
| extracellular matrix                           | 5                   | 1.21E-02                   | Aebp1,Col1a2,Efemp1,Efemp2,Thbs2                                                                                                                              |
| protein complex                                | 14                  | 1.21E-02                   | Clic4,Col1a2,Ftl1,Gsn,Hist1h2bk,Hist2h4,Inhba,Myl12b,Myl6,Psmd3,Ywhab,Ywhae,Ywhaq,Ywhaz                                                                       |
| <b>GOBP</b>                                    |                     |                            |                                                                                                                                                               |
| regulation of biological quality               | 14                  | 1.60E-02                   | Anxa5,Cfl1,Clic4,Col1a2,Dbi,Ftl1,Inhba,Myl12b,Thbs2,Tmsb10,Ywhab,Ywhae,Ywhag,Ywhaz                                                                            |
| <b>GOMF (Gene Ontology Molecular Function)</b> |                     |                            |                                                                                                                                                               |
| calcium ion binding                            | 8                   | 4.03E-03                   | Anxa5,C1ra,Efemp1,Efemp2,Gsn,Myl12b,Myl6,Thbs2                                                                                                                |
| phosphoserine binding                          | 2                   | 2.65E-02                   | Ywhab,Ywhae                                                                                                                                                   |
| rRNA binding                                   | 3                   | 4.06E-02                   | Npm1,Rpl8,Rps18                                                                                                                                               |

|                                        |   |          |                                   |
|----------------------------------------|---|----------|-----------------------------------|
| <b>protein domain specific binding</b> | 6 | 4.06E-02 | Gsn,Ywhab,Ywhae,Ywhag,Ywhaq,Ywhaz |
| <b>Pfam</b>                            |   |          |                                   |
| <b>14-3-3 protein</b>                  | 4 | 5.84E-08 | Ywhab,Ywhae,Ywhag,Ywhaq           |

700

701

702

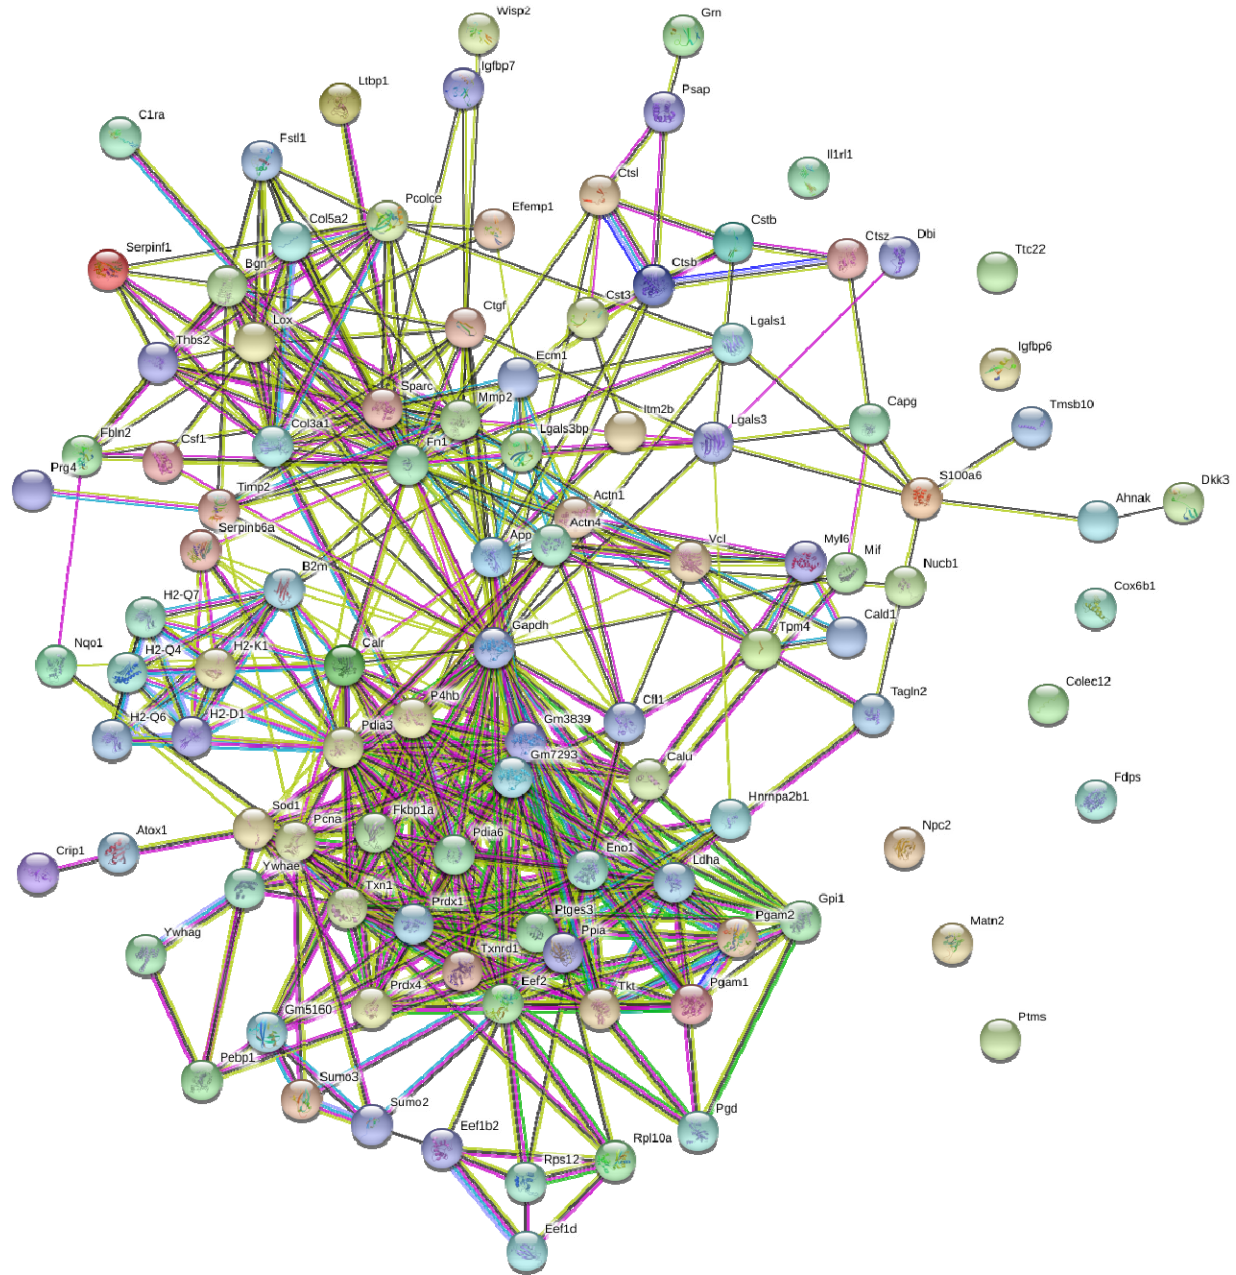

703  
704 **Figure S 1** String DB network illustrating interactions between proteins in the osteocyte secretome, with  
705 significant degree of protein-protein interaction ( $p < 10^{-16}$ )



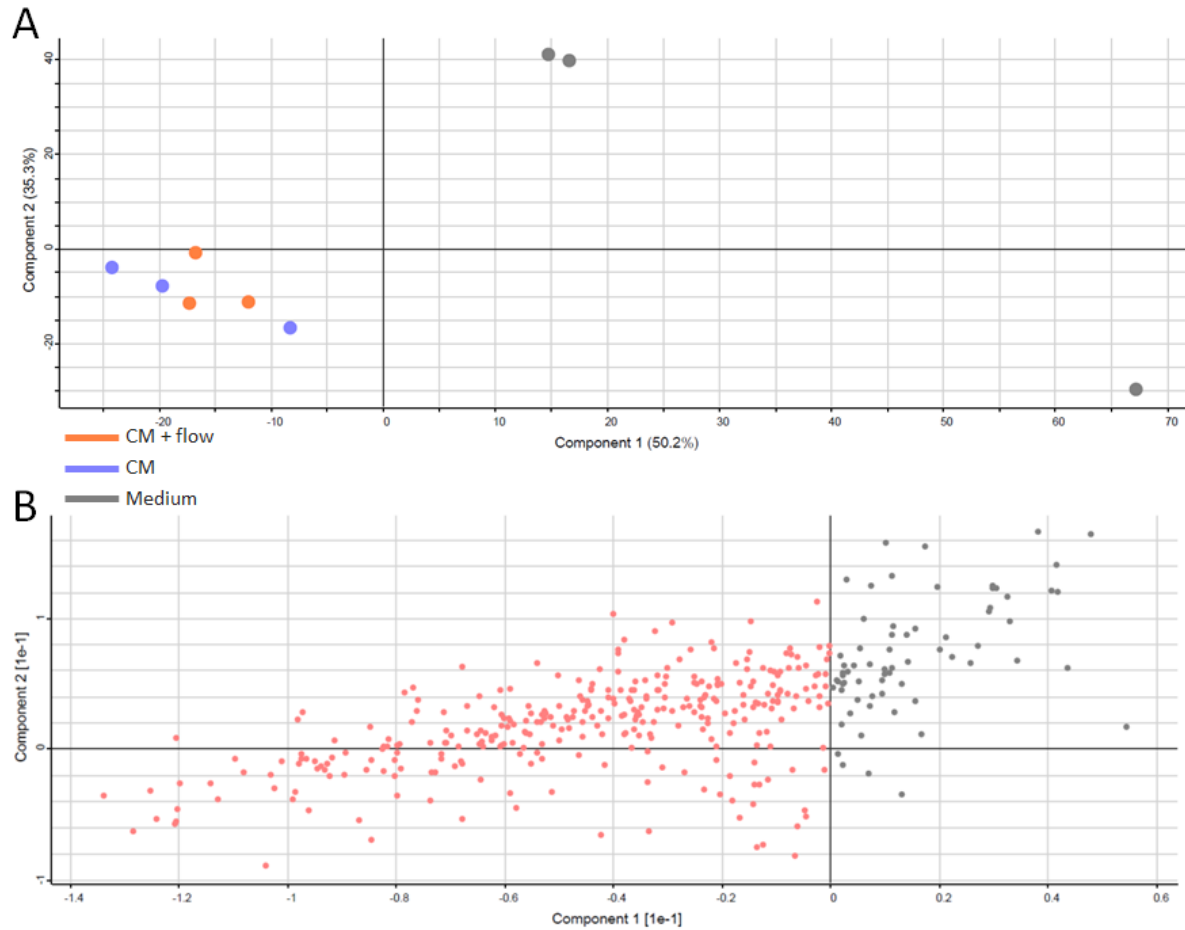

706

707 **Figure S 2** Principal Component Analysis (PCA) revealing the variance between the three experimental  
708 groups and indicating three main clusters of data (C). The proteins primarily driving the separation  
709 between the medium groups and the control groups are highlighted in red (D).

710

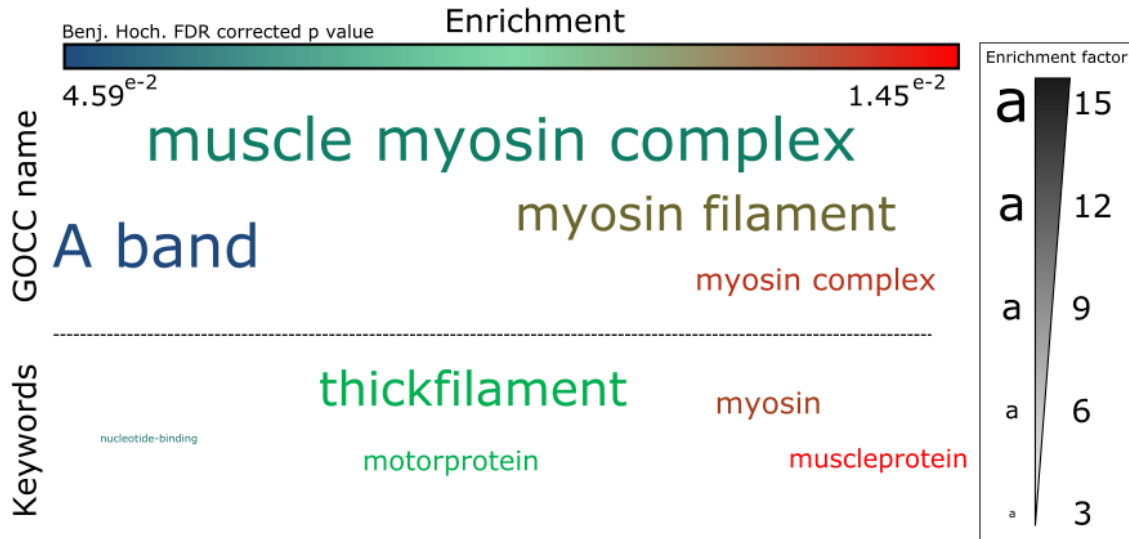

711

712 **Figure S 3** Enrichment analysis of GOCC terms and Uniprot keywords in proteins with greater  
713 expression in control medium samples, using Fisher's exact test represented as a word cloud (D). The size  
714 of the word represents enrichment of terms, while colour represents FDR corrected p value. All terms  
715 with a minimum 0.05 FDR corrected p value were included.

716

717

718

719

720

721

722

723

724

725

726

727

728 **Table S 4** Functional enrichments in Medium proteins using String DB, with observed gene count out of  
 729 a total 35 proteins with an FDR cut-off of 2%.

| Pathway description                          | Observed gene count | False discovery rate (FDR) |
|----------------------------------------------|---------------------|----------------------------|
| <u>GOCC</u>                                  |                     |                            |
| myosin filament                              | 6                   | 1.67E-10                   |
| myofibril                                    | 7                   | 6.42E-06                   |
| actin cytoskeleton                           | 8                   | 2.41E-05                   |
| muscle myosin complex                        | 3                   | 2.66E-05                   |
| contractile fiber                            | 6                   | 1.08E-04                   |
| stress fiber                                 | 4                   | 2.23E-04                   |
| myosin complex                               | 4                   | 2.23E-04                   |
| sarcomere                                    | 5                   | 5.37E-04                   |
| filopodium                                   | 4                   | 8.68E-04                   |
| intracellular non-membrane-bounded organelle | 15                  | 3.03E-03                   |
| <u>GOBP</u>                                  |                     |                            |
| mesenchyme migration                         | 4                   | 3.24E-07                   |
| muscle contraction                           | 6                   | 2.41E-04                   |
| muscle filament sliding                      | 3                   | 5.11E-04                   |
| mesenchyme morphogenesis                     | 4                   | 5.46E-04                   |
| tissue morphogenesis                         | 8                   | 4.41E-03                   |
| striated muscle contraction                  | 4                   | 4.56E-03                   |
| skeletal muscle contraction                  | 3                   | 8.26E-03                   |
| <u>GOME</u>                                  |                     |                            |
| microfilament motor activity                 | 4                   | 3.47E-05                   |
| purine ribonucleoside binding                | 14                  | 3.67E-05                   |
| purine ribonucleotide binding                | 14                  | 3.67E-05                   |
| purine ribonucleoside triphosphate binding   | 14                  | 3.67E-05                   |
| small molecule binding                       | 15                  | 2.09E-04                   |
| anion binding                                | 15                  | 2.31E-04                   |
| motor activity                               | 5                   | 2.42E-04                   |
| organic cyclic compound binding              | 20                  | 3.93E-04                   |
| ATP binding                                  | 11                  | 8.46E-04                   |
| heterocyclic compound binding                | 19                  | 1.34E-03                   |
| <u>Pfam</u>                                  |                     |                            |
| Actin                                        | 4                   | 1.78E-05                   |
| Myosin N-terminal SH3-like domain            | 3                   | 9.33E-05                   |
| Myosin tail                                  | 3                   | 3.72E-04                   |
| Myosin head (motor domain)                   | 3                   | 1.07E-03                   |

|                                         |   |          |
|-----------------------------------------|---|----------|
| Ribosomal protein L6e                   | 2 | 1.07E-03 |
| Ribosomal protein L6, N-terminal domain | 2 | 1.07E-03 |

---

730

731

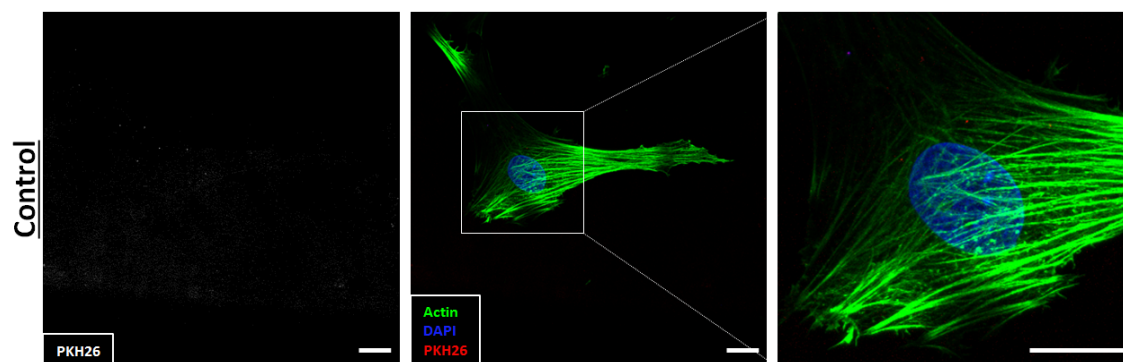

732

733 **Figure S 4** Control samples with no EVs and PKH26 staining demonstrating minimal unspecific  
734 fluorescence (Scale = 10 $\mu$ m).

735

736

737

738

739

740

741

742

743

744

745

746 **Acknowledgments**

747 The authors would like to acknowledge funding from European Research Council (ERC)  
748 Starting and Proof of Concept Grant (336882 & 825905), Science Foundation Ireland (SFI)  
749 Support Grant SFI 13/ERC/L2864 and Irish Research Council Postgraduate Scholarship  
750 (GOIPG/2014/493)

751

752 **References**

753

- 754 1. Dallas, S.L., M. Prideaux, and L.F. Bonewald, *The osteocyte: An endocrine cell . . . and*  
755 *more*. Endocrine Reviews, 2013. **34**(5): p. 658-690.
- 756 2. Bonewald, L.F., *Osteocyte biology: its implications for osteoporosis*. J Musculoskelet  
757 Neuronal Interact, 2004. **4**(1): p. 101-4.
- 758 3. Qiu, S., et al., *Reduced iliac cancellous osteocyte density in patients with osteoporotic*  
759 *vertebral fracture*. J Bone Miner Res, 2003. **18**(9): p. 1657-63.
- 760 4. Rachner, T.D., S. Khosla, and L.C. Hofbauer, *Osteoporosis: now and the future*. The  
761 Lancet, 2011. **377**(9773): p. 1276-1287.
- 762 5. Bonewald, L.F., *The Role of the Osteocyte in Bone and Nonbone Disease*. Endocrinology  
763 and Metabolism Clinics of North America, 2017. **46**(1): p. 1-18.
- 764 6. Zhou, J.Z., et al., *Osteocytic connexin hemichannels suppress breast cancer growth and*  
765 *bone metastasis*. Oncogene, 2016. **35**(43): p. 5597-5607.
- 766 7. Bonewald, L.F., *The amazing osteocyte*. Journal of Bone and Mineral Research, 2011.  
767 **26**(2): p. 229-238.
- 768 8. Schaffler, M.B. and O.D. Kennedy, *Osteocyte Signaling in Bone*. Current Osteoporosis  
769 Reports, 2012. **10**(2): p. 118-125.
- 770 9. Taylor, A.F., et al., *Mechanically stimulated osteocytes regulate osteoblastic activity via*  
771 *gap junctions*. Am J Physiol Cell Physiol, 2007. **292**(1): p. C545-52.
- 772 10. Brady, R.T., F.J. O'Brien, and D.A. Hoey, *Mechanically stimulated bone cells secrete*  
773 *paracrine factors that regulate osteoprogenitor recruitment, proliferation, and*  
774 *differentiation*. Biochem Biophys Res Commun, 2015. **459**(1): p. 118-23.

- 775 11. Hoey, D.A., D.J. Kelly, and C.R. Jacobs, *A role for the primary cilium in paracrine*  
776 *signaling between mechanically stimulated osteocytes and mesenchymal stem cells.*  
777 *Biochemical and Biophysical Research Communications*, 2011. **412**(1): p. 182-187.
- 778 12. Tan, S.D., et al., *Osteocytes subjected to fluid flow inhibit osteoclast formation and bone*  
779 *resorption.* *Bone*, 2007. **41**(5): p. 745-751.
- 780 13. You, L., et al., *Osteocytes as Mechanosensors in the Inhibition of Bone Resorption Due*  
781 *to Mechanical Loading.* *Bone*, 2008. **42**(1): p. 172-179.
- 782 14. Park, D., et al., *Endogenous bone marrow MSCs are dynamic, fate-restricted participants*  
783 *in bone maintenance and regeneration.* *Cell Stem Cell*, 2012. **10**(3): p. 259-72.
- 784 15. McClung, M.R., *Sclerostin antibodies in osteoporosis: latest evidence and therapeutic*  
785 *potential.* *Therapeutic advances in musculoskeletal disease*, 2017. **9**(10): p. 263-270.
- 786 16. Chen, W., et al., *Gene expression patterns of osteocyte-like MLO-Y4 cells in response to*  
787 *cyclic compressive force stimulation.* *Cell Biology International*, 2010. **34**(5): p. 425-432.
- 788 17. Wasserman, E., et al., *Differential load-regulated global gene expression in mouse*  
789 *trabecular osteocytes.* *Bone*, 2013. **53**(1): p. 14-23.
- 790 18. Govey, P.M., et al., *Integrative transcriptomic and proteomic analysis of osteocytic cells*  
791 *exposed to fluid flow reveals novel mechano-sensitive signaling pathways.* *J Biomech*,  
792 2014. **47**(8): p. 1838-45.
- 793 19. Yanez-Mo, M., et al., *Biological properties of extracellular vesicles and their*  
794 *physiological functions.* *J Extracell Vesicles*, 2015. **4**: p. 27066.
- 795 20. Davies, O.G., et al., *Annexin-enriched osteoblast-derived vesicles act as an extracellular*  
796 *site of mineral nucleation within developing stem cell cultures.* *Sci Rep*, 2017. **7**(1): p.  
797 12639.
- 798 21. Morhayim, J., et al., *Paracrine Signaling by Extracellular Vesicles via Osteoblasts.*  
799 *Current Molecular Biology Reports*, 2016. **2**(1): p. 48-55.
- 800 22. Cui, Y., et al., *Exosomes derived from mineralizing osteoblasts promote ST2 cell*  
801 *osteogenic differentiation by alteration of microRNA expression.* *FEBS Lett*, 2016.  
802 **590**(1): p. 185-92.
- 803 23. Li, Q., et al., *Extracellular vesicle-mediated bone metabolism in the bone*  
804 *microenvironment.* *J Bone Miner Metab*, 2018. **36**(1): p. 1-11.

- 805 24. Sato, M., et al., *Circulating osteocyte-derived exosomes contain miRNAs which are*  
806 *enriched in exosomes from MLO-Y4 cells.* Biomedical Reports, 2017. **6**(2): p. 223-231.
- 807 25. Qin, Y., et al., *Myostatin inhibits osteoblastic differentiation by suppressing osteocyte-*  
808 *derived exosomal microRNA-218: A novel mechanism in muscle-bone communication.* J  
809 Biol Chem, 2017. **292**(26): p. 11021-11033.
- 810 26. Gimona, M., et al., *Manufacturing of Human Extracellular Vesicle-Based Therapeutics*  
811 *for Clinical Use.* Int J Mol Sci, 2017. **18**(6).
- 812 27. Cappariello, A., et al., *Osteoblast-derived extracellular vesicles are biological tools for*  
813 *the delivery of active molecules to bone.* J Bone Miner Res, 2017.
- 814 28. Whitham, M., et al., *Extracellular Vesicles Provide a Means for Tissue Crosstalk during*  
815 *Exercise.* Cell Metabolism, 2018. **27**(1): p. 237-251.e4.
- 816 29. Bab, I., et al., *Histone H4-related osteogenic growth peptide (OGP): A novel circulating*  
817 *stimulator of osteoblastic activity.* EMBO Journal, 1992. **11**(5): p. 1867-1873.
- 818 30. Southwick, F.S., *Gelsolin and ADF/cofilin enhance the actin dynamics of motile cells.*  
819 *Proceedings of the National Academy of Sciences*, 2000. **97**(13): p. 6936.
- 820 31. Thouverey, C., et al., *Proteomic characterization of biogenesis and functions of matrix*  
821 *vesicles released from mineralizing human osteoblast-like cells.* Journal of Proteomics,  
822 2011. **74**(7): p. 1123-1134.
- 823 32. Altschul, S.F., et al., *Gapped BLAST and PSI-BLAST: a new generation of protein*  
824 *database search programs.* Nucleic Acids Res, 1997. **25**(17): p. 3389-402.
- 825 33. Kent, W.J., et al., *The human genome browser at UCSC.* Genome Res, 2002. **12**(6): p.  
826 996-1006.
- 827 34. Turner, C.H., et al., *Recruitment and proliferative responses of osteoblasts after*  
828 *mechanical loading in vivo determined using sustained-release bromodeoxyuridine.*  
829 *Bone*, 1998. **22**(5): p. 463-9.
- 830 35. Chen, J.C., et al., *Mechanical signals promote osteogenic fate through a primary cilia-*  
831 *mediated mechanism.* FASEB J, 2016. **30**(4): p. 1504-11.
- 832 36. Vezeridis, P.S., et al., *Osteocytes subjected to pulsating fluid flow regulate osteoblast*  
833 *proliferation and differentiation.* Biochem Biophys Res Commun, 2006. **348**(3): p. 1082-  
834 8.

- 835 37. Schaffler, M.B., et al., *Osteocytes: master orchestrators of bone*. *Calcif Tissue Int*, 2014.  
836 **94**(1): p. 5-24.
- 837 38. Govey, P.M., A.E. Loisel, and H.J. Donahue, *Biophysical regulation of stem cell*  
838 *differentiation*. *Curr Osteoporos Rep*, 2013. **11**(2): p. 83-91.
- 839 39. Liu, Y., et al., *Homodimerization of Ror2 tyrosine kinase receptor induces 14-3-3(beta)*  
840 *phosphorylation and promotes osteoblast differentiation and bone formation*. *Mol*  
841 *Endocrinol*, 2007. **21**(12): p. 3050-61.
- 842 40. Priam, S., et al., *Identification of soluble 14-3-3 as a novel subchondral bone mediator*  
843 *involved in cartilage degradation in osteoarthritis*. *Arthritis Rheum*, 2013. **65**(7): p.  
844 1831-42.
- 845 41. Rodan, G.A. and A.R. Rodan, *The family of osteoblast transcription factors is growing*.  
846 *IBMS BoneKEy*, 2005. **2**(10): p. 12-15.
- 847 42. Shen, J., et al., *Transcriptional induction of the osteocalcin gene during osteoblast*  
848 *differentiation involves acetylation of histones H3 and H4*. *Molecular Endocrinology*,  
849 2003. **17**(4): p. 743-756.
- 850 43. Dudakovic, A., et al., *Histone deacetylase inhibition promotes osteoblast maturation by*  
851 *altering the histone H4 epigenome and reduces Akt phosphorylation*. *J Biol Chem*, 2013.  
852 **288**(40): p. 28783-91.
- 853 44. Paino, F., et al., *Histone Deacetylase Inhibition with Valproic Acid Downregulates*  
854 *Osteocalcin Gene Expression in Human Dental Pulp Stem Cells and Osteoblasts:*  
855 *Evidence for HDAC2 Involvement*. *Stem Cells (Dayton, Ohio)*, 2014. **32**(1): p. 279-289.
- 856 45. Pigossi, S.C., et al., *Role of Osteogenic Growth Peptide (OGP) and OGP(10–14) in Bone*  
857 *Regeneration: A Review*. *International Journal of Molecular Sciences*, 2016. **17**(11): p.  
858 1885.
- 859 46. Haut Donahue, T.L., et al., *Annexin V disruption impairs mechanically induced calcium*  
860 *signaling in osteoblastic cells*. *Bone*, 2004. **35**(3): p. 656-63.
- 861 47. Genetos, D.C., et al., *Impaired osteoblast differentiation in annexin A2- and -A5-deficient*  
862 *cells*. *PLoS One*, 2014. **9**(9): p. e107482.
- 863 48. Bornstein, P., et al., *Thrombospondin 2 modulates collagen fibrillogenesis and*  
864 *angiogenesis*. *J Investig Dermatol Symp Proc*, 2000. **5**(1): p. 61-6.



- 865 49. Hankenson, K.D., et al., *Increased marrow-derived osteoprogenitor cells and endosteal*  
866 *bone formation in mice lacking thrombospondin 2*. Journal of Bone and Mineral  
867 Research, 2000. **15**(5): p. 851-862.
- 868 50. Miedel, E., et al., *Disruption of thrombospondin-2 accelerates ischemic fracture healing*.  
869 Journal of Orthopaedic Research, 2013. **31**(6): p. 935-943.
- 870 51. Morrell, A.E., et al., *Mechanically induced Ca<sup>2+</sup> oscillations in osteocytes release*  
871 *extracellular vesicles and enhance bone formation*. Bone Research, 2018. **6**(1): p. 6.
- 872 52. Morhayim, J., et al., *Proteomic signatures of extracellular vesicles secreted by*  
873 *nonmineralizing and mineralizing human osteoblasts and stimulation of tumor cell*  
874 *growth*. FASEB J, 2015. **29**(1): p. 274-85.
- 875 53. Huang, C.-C., et al., *Exosomes as Biomimetic Tools for Stem Cell Differentiation:*  
876 *Applications in Dental Pulp Tissue Regeneration*. Biomaterials, 2016. **111**: p. 103-115.
- 877 54. Xie, H., et al., *Extracellular Vesicle-functionalized Decalcified Bone Matrix Scaffolds*  
878 *with Enhanced Pro-angiogenic and Pro-bone Regeneration Activities*. Sci Rep, 2017. **7**:  
879 p. 45622.
- 880 55. Diomedea, F., et al., *Three-dimensional printed PLA scaffold and human gingival stem*  
881 *cell-derived extracellular vesicles: a new tool for bone defect repair*. Stem Cell Research  
882 & Therapy, 2018. **9**: p. 104.
- 883 56. Davies, O.G., et al., *Annexin-enriched osteoblast-derived vesicles act as an extracellular*  
884 *site of mineral nucleation within developing stem cell cultures*. Scientific Reports, 2017.  
885 **7**(1).
- 886 57. Golub, E.E., *Role of matrix vesicles in biomineralization*. Biochim Biophys Acta, 2009.  
887 **1790**(12): p. 1592-8.
- 888 58. Muhrad, A., et al., *Inorganic phosphate regulates the binding of cofilin to actin*  
889 *filaments*. Febs j, 2006. **273**(7): p. 1488-96.
- 890 59. Tavaafoghi, M. and M. Cerruti, *The role of amino acids in hydroxyapatite mineralization*.  
891 Journal of The Royal Society Interface, 2016. **13**(123).
- 892 60. Cheng, B., et al., *PGE(2) is essential for gap junction-mediated intercellular*  
893 *communication between osteocyte-like MLO-Y4 cells in response to mechanical strain*.  
894 Endocrinology, 2001. **142**(8): p. 3464-73.

- 895 61. Zhao, S., et al., *MLO-Y4 osteocyte-like cells support osteoclast formation and activation*.  
896 *Journal of Bone and Mineral Research*, 2002. **17**(11): p. 2068-2079.
- 897 62. Shah, K.M., et al., *Osteocyte isolation and culture methods*. *BoneKEy reports*, 2016. **5**: p.  
898 838-838.
- 899 63. Kato, Y., et al., *Establishment of an Osteocyte-like Cell Line, MLO-Y4*. *Journal of Bone*  
900 *and Mineral Research*, 1997. **12**(12): p. 2014-2023.
- 901 64. Rosser, J. and L.F. Bonewald, *Studying osteocyte function using the cell lines MLO-Y4*  
902 *and MLO-A5*. *Methods Mol Biol*, 2012. **816**: p. 67-81.
- 903 65. Stavenschi, E., M.-N. Labour, and D.A. Hoey, *Oscillatory fluid flow induces the*  
904 *osteogenic lineage commitment of mesenchymal stem cells: The effect of shear stress*  
905 *magnitude, frequency, and duration*. *Journal of Biomechanics*, 2017. **55**: p. 99-106.
- 906 66. Cox, J. and M. Mann, *MaxQuant enables high peptide identification rates, individualized*  
907 *p.p.b.-range mass accuracies and proteome-wide protein quantification*. *Nature*  
908 *Biotechnology*, 2008. **26**(12): p. 1367-1372.
- 909 67. Tyanova, S., T. Temu, and J. Cox, *The MaxQuant computational platform for mass*  
910 *spectrometry-based shotgun proteomics*. *Nature Protocols*, 2016. **11**(12): p. 2301-2319.
- 911 68. Cox, J., et al., *Andromeda: a peptide search engine integrated into the MaxQuant*  
912 *environment*. *J Proteome Res*, 2011. **10**(4): p. 1794-805.
- 913 69. Cox, J., et al., *Accurate Proteome-wide Label-free Quantification by Delayed*  
914 *Normalization and Maximal Peptide Ratio Extraction, Termed MaxLFQ*. *Molecular &*  
915 *Cellular Proteomics : MCP*, 2014. **13**(9): p. 2513-2526.
- 916 70. Tyanova, S., et al., *The Perseus computational platform for comprehensive analysis of*  
917 *(prote)omics data*. 2016. **13**(9): p. 731-40.
- 918 71. Szklarczyk, D., et al., *STRING v10: Protein-protein interaction networks, integrated over*  
919 *the tree of life*. *Nucleic Acids Research*, 2015. **43**(D1): p. D447-D452.

920
